# Supplementary material for: Cmr1/WDR76 defines a nuclear genotoxic stress body linking genome integrity and protein quality control
Source: PubMed Central journal article supplement (PMC4389229; doi:10.1038/ncomms7533), 2015-03-30
Supplement: ncomms7533-s1.pdf [file ncomms7533-s1.pdf]

## SUPPLEMENTARY INFORMATION

### Supplementary figures

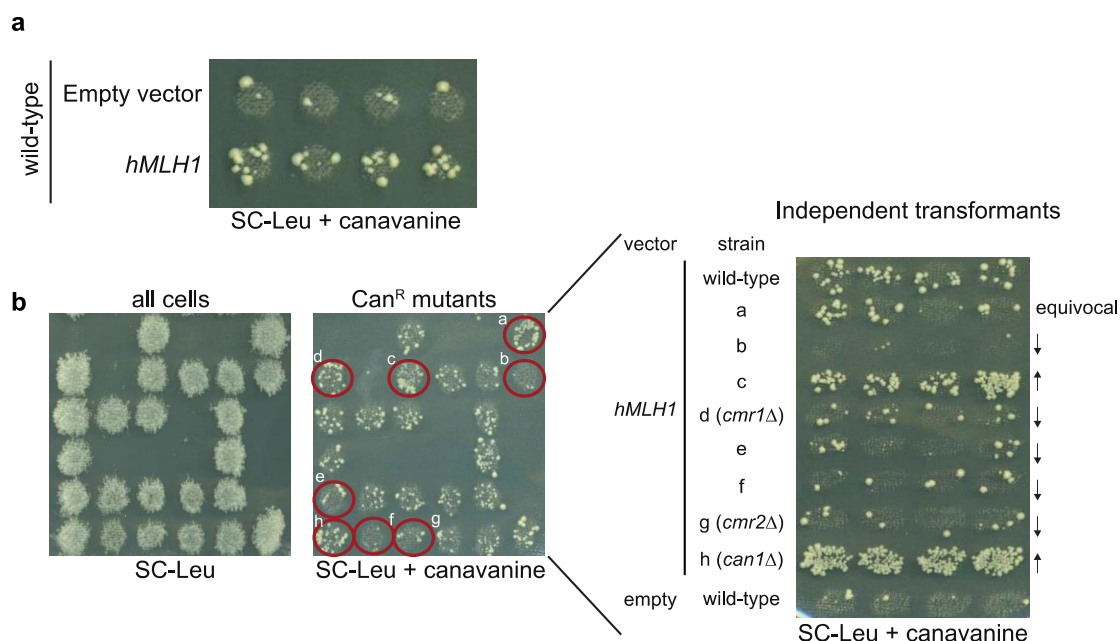

**Supplementary Figure 1: Genome-wide identification of factors that influence forward mutation rates.** (a) Experimental design. Expression of hMLH1 in yeast causes increased mutations in the *CAN1* gene. (b) Experimental setup of the genome-wide screen. A collection of 4800 gene deletion strains (EUROSCARF) was transformed with a plasmid expressing hMLH1 (pEH333) (referred to as “all cells”) and mutation frequencies were assessed on canavanine containing medium<sup>1</sup>. Mutants with increased or decreased mutation frequencies were re-transformed and four independent transformants assessed for the frequency of canavanine resistance (Can<sup>R</sup>, right panel). “Equivocal” hits were eliminated from the analysis. Examples of mutants with increased or decreased mutation rates are reported. From this screen, 667 gene deletions either increased or decreased the inherent mutation rate and among these, two uncharacterized ORFs were named *CMR1* (*YDL156W*, strain d) and *CMR2* (*YOR093C*, strain g). A *can1*Δ mutant (strain h) was used as a negative control.

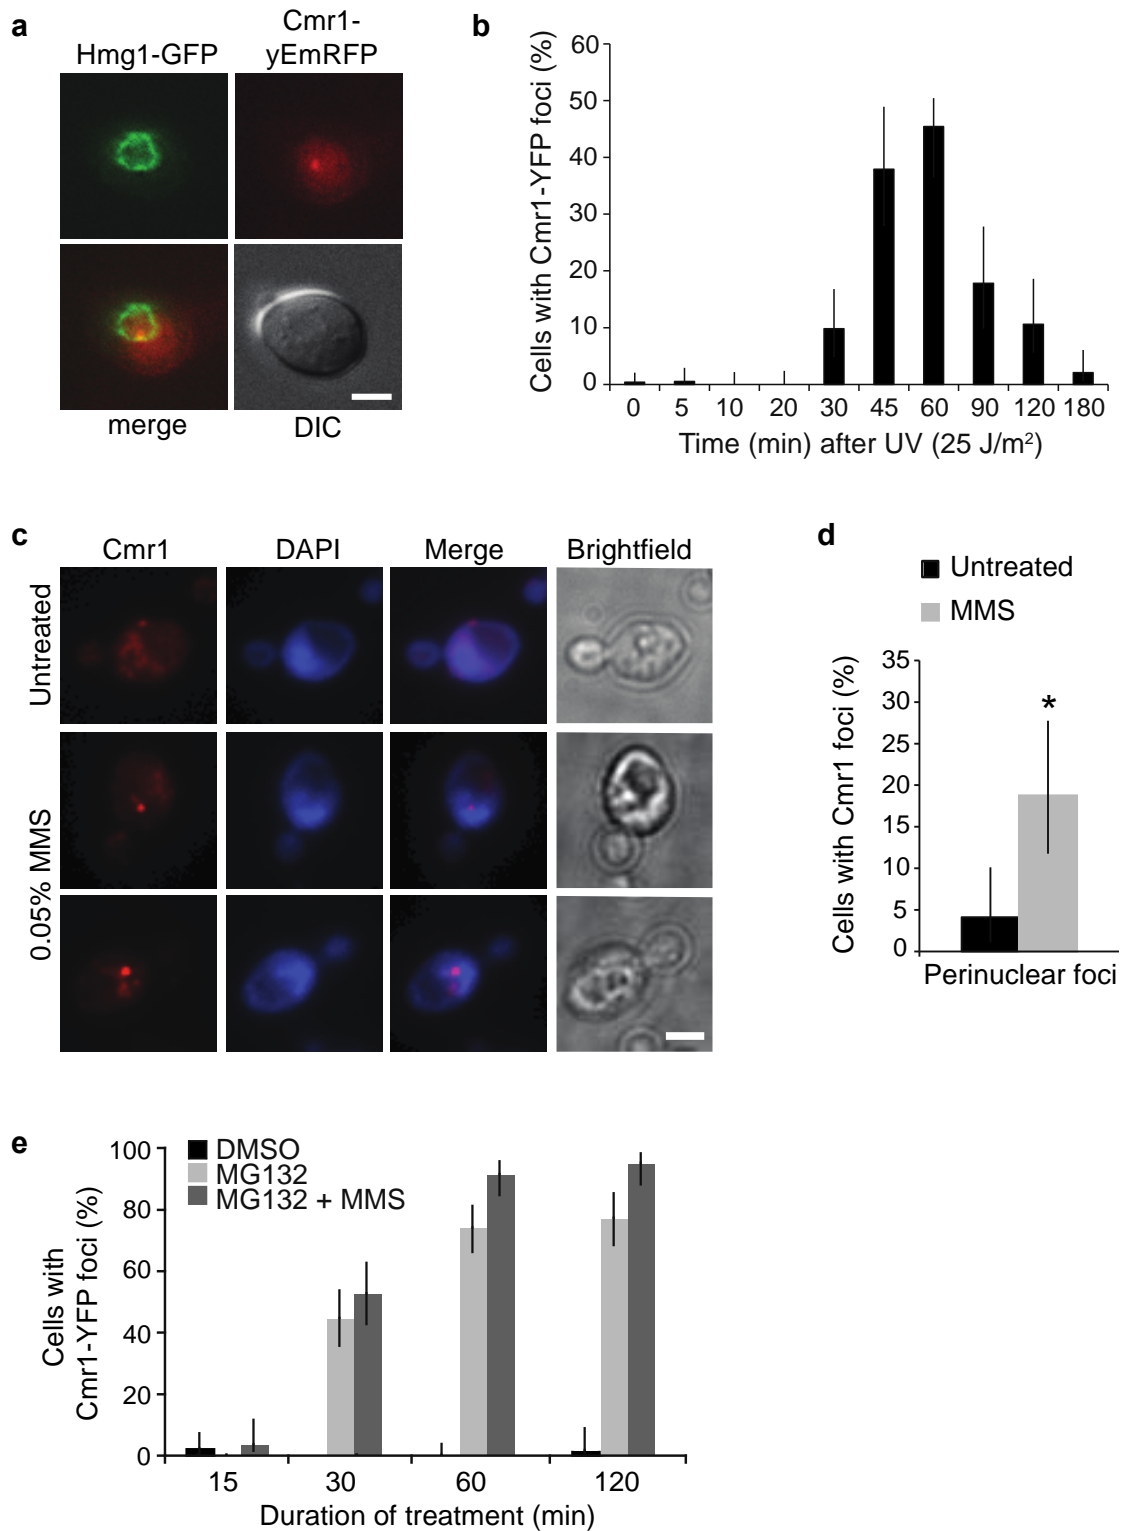

**Supplementary Figure 2: Native Cmr1 localizes to perinuclear foci in response to replication stress.** (a) Cmr1-yEmRFP foci localize inside the nucleus. Nuclear envelope is visualized by Hmg1-GFP in cells treated with 0.05% MMS. Scale bar is equal to 3  $\mu$ m. IG111 was crossed to Hmg1-GFP expressing strain from the GFP collection and diploids were imaged. (b) Kinetics of UV-induced Cmr1 foci. Cmr1-YFP foci were quantified in strain IG66 at different time points after UV-irradiation.

(c) Wild-type cells (ML8-9A), untreated or treated with 0.05% MMS for 2 hours were fixed and subjected to immunostaining with an anti-Cmr1 primary antibody, followed by staining with an Alexa Fluor 594 conjugated secondary antibody. DAPI staining was performed before imaging. Scale bar 3  $\mu\text{m}$ . (d) Percentage of cells containing Cmr1 foci was quantified. Bright foci localizing in the cytoplasm were defined as background, while perinuclear foci were considered as Cmr1 positive. Error bars represent 95% confidence intervals from two replicates ( $n > 150$ ). \*, P-value  $< 0.02$ . (e) Cmr1 re-localizes into foci upon proteasome inhibition. Cells (IG66) expressing Cmr1-YFP were incubated in the absence or presence of MG132 ( $75 \mu\text{g ml}^{-1}$ ) or MG132 and MMS (0.05%) for the indicated time, and the percentage of cells with foci was quantified. All incubations were performed in the presence of 3.7% DMSO. Error bars represent 95% confidence intervals. Three replicates ( $n > 200$ ).

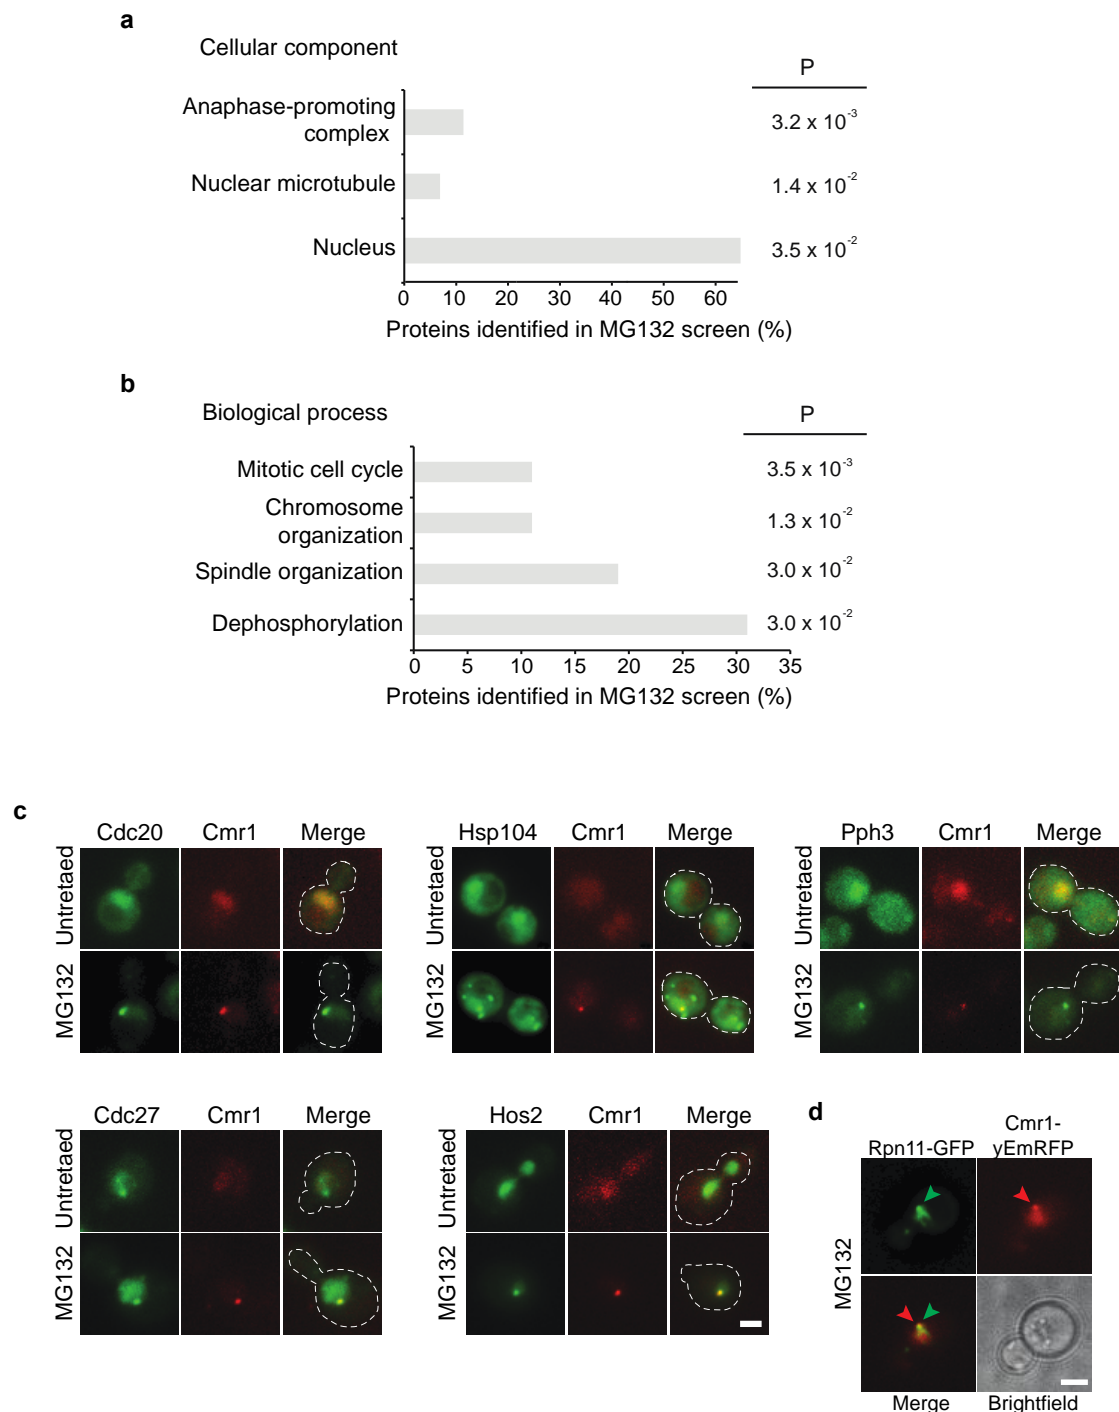

**Supplementary Figure 3: Cmr1 co-localizes with proteins from a small subset of GO groups after proteasome inhibition.** GO enrichment analysis of Cmr1 co-localizing proteins after MG132 treatment. Significantly over-represented GO cellular components (a) or biological processes (b) are shown. Bars indicate the percentage of Cmr1 co-localizing proteins belonging to the indicated GO term. The BinGO software<sup>2</sup> was used to calculate the enrichment and the significance of the enrichment was determined by Fisher's test. P-values were corrected using the Benjamini and Hochberg false discovery rate correction. (c) Examples of proteins co-localizing with

Cmr1. Cells expressing Cmr1-yEmRFP and the indicated GFP-fusion protein were imaged by fluorescence microscopy before and after treatment with MG132 ( $75 \mu\text{g ml}^{-1}$ ). Dashed line indicates cell perimeter. Scale bar is equal to  $3 \mu\text{m}$ . **(d)** The proteasome accumulates at INQ. Cells expressing Rpn11-GFP and Cmr1-yEmRFP (IG328-4C) were imaged after MG132 treatment for 1 hour. Arrowheads mark co-localizing foci. Bar equals  $3 \mu\text{m}$ .

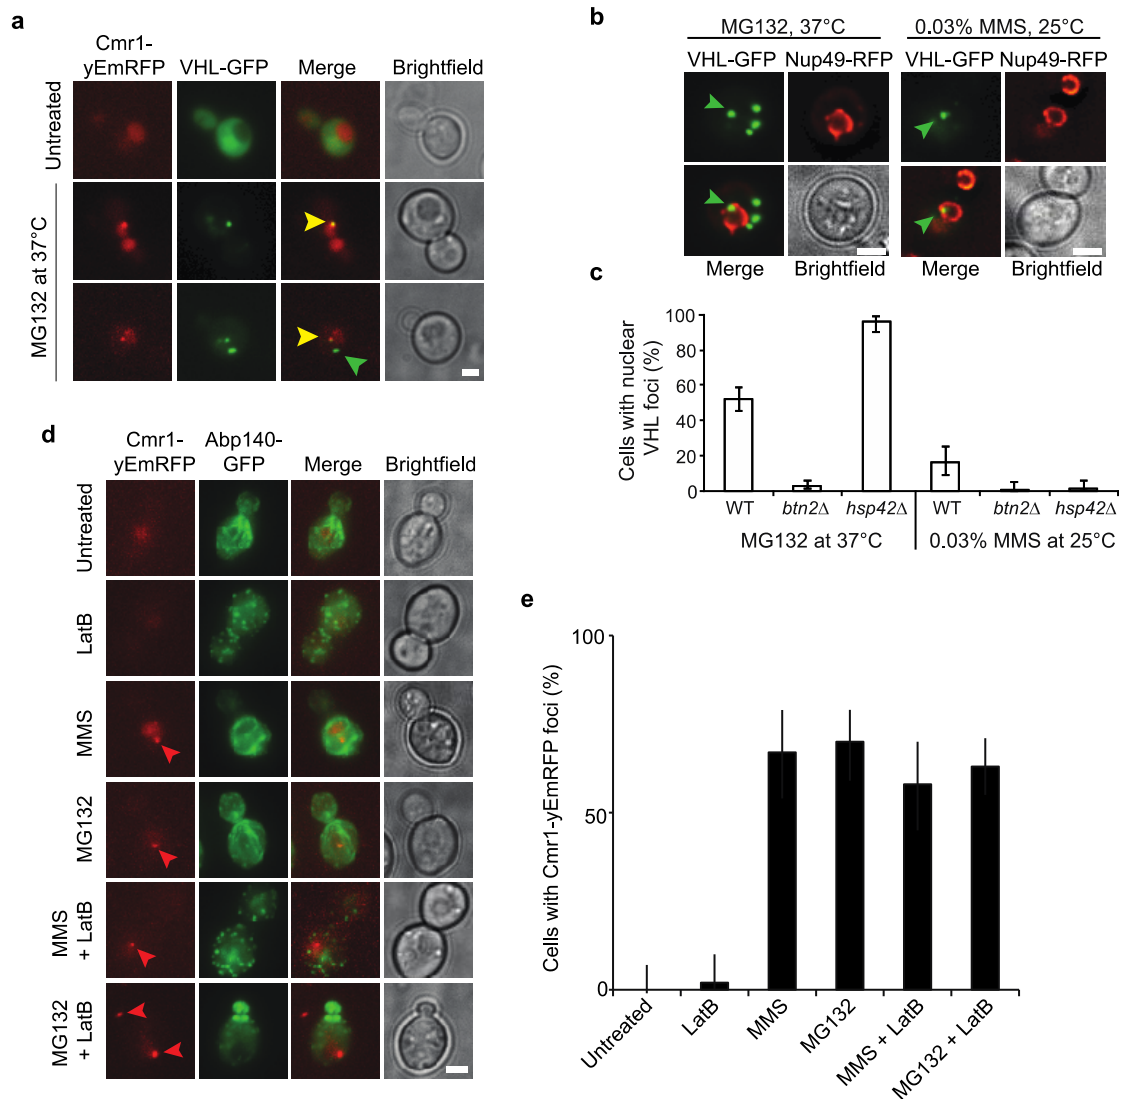

**Supplementary Figure 4: Cmr1 re-localization into INQ does not depend on the actin cytoskeleton.** (a) VHL foci co-localize with Cmr1. Cells expressing Cmr1-yEmRFP (IG111) were transformed with pESC-VHL-GFP and imaged at 25°C and at 37°C with addition of 75  $\mu\text{g ml}^{-1}$  MG132 after galactose induction for 3 hours. Cmr1 colocalizes with VHL at a JUNQ-like perinuclear focus (INQ, yellow arrowhead) but not at the IPOD (green arrowhead). Scale bar 2  $\mu\text{m}$ . (b) A proportion of misfolded VHL foci reside in the nucleus. Localization of VHL-GFP (pESC-VHL-GFP) was monitored in wild-type cells (ML8-9A) at 37°C in the presence of MG132 (50  $\mu\text{g ml}^{-1}$ ) or at 25°C after treatment with 0.03% MMS for 1 hour. Fifty-two percent of the VHL foci (green arrowheads) were observed inside the nuclear membrane marked by Nup49-yEmRFP (pNEB32). (c) Genetic requirements for nuclear foci of misfolded VHL. The experiment in panel b was quantified in wild-type (ML8-9A), *btn2Δ* (CC1-2D) and *hsp42Δ* (CC2-2B) strains for two independent experiments ( $n > 150$ ). Error

bars represent 95% confidence intervals. No cytoplasmic VHL foci were observed after MMS treatment. **(d)** Cmr1 re-localization to foci is not perturbed by inhibition of actin polymerization. Cells expressing Cmr1-yEmRFP and the actin binding protein Abp140-GFP (IG111 crossed to Abp140-GFP strain from GFP collection) untreated or treated with MMS (0.05%) or MG132 ( $75 \mu\text{g ml}^{-1}$ ) for 2 hours were subjected to simultaneous treatment with latrunculin B ( $50 \mu\text{M}$ ) to inhibit actin polymerization, and imaged by fluorescence microscopy. Abp140 was used as a marker for actin filaments (first row) or actin patches (second row). Arrowheads indicate Cmr1 foci. Scale bar is equal to  $2 \mu\text{m}$ . **(e)** Quantification of Cmr1 re-localization dependency on the actin cytoskeleton. Percentage of cells in panel **d** exhibiting Cmr1 foci were quantified after treatment with different combinations of drugs. Error bars represent 95% confidence intervals. Two replicates,  $n > 100$ .

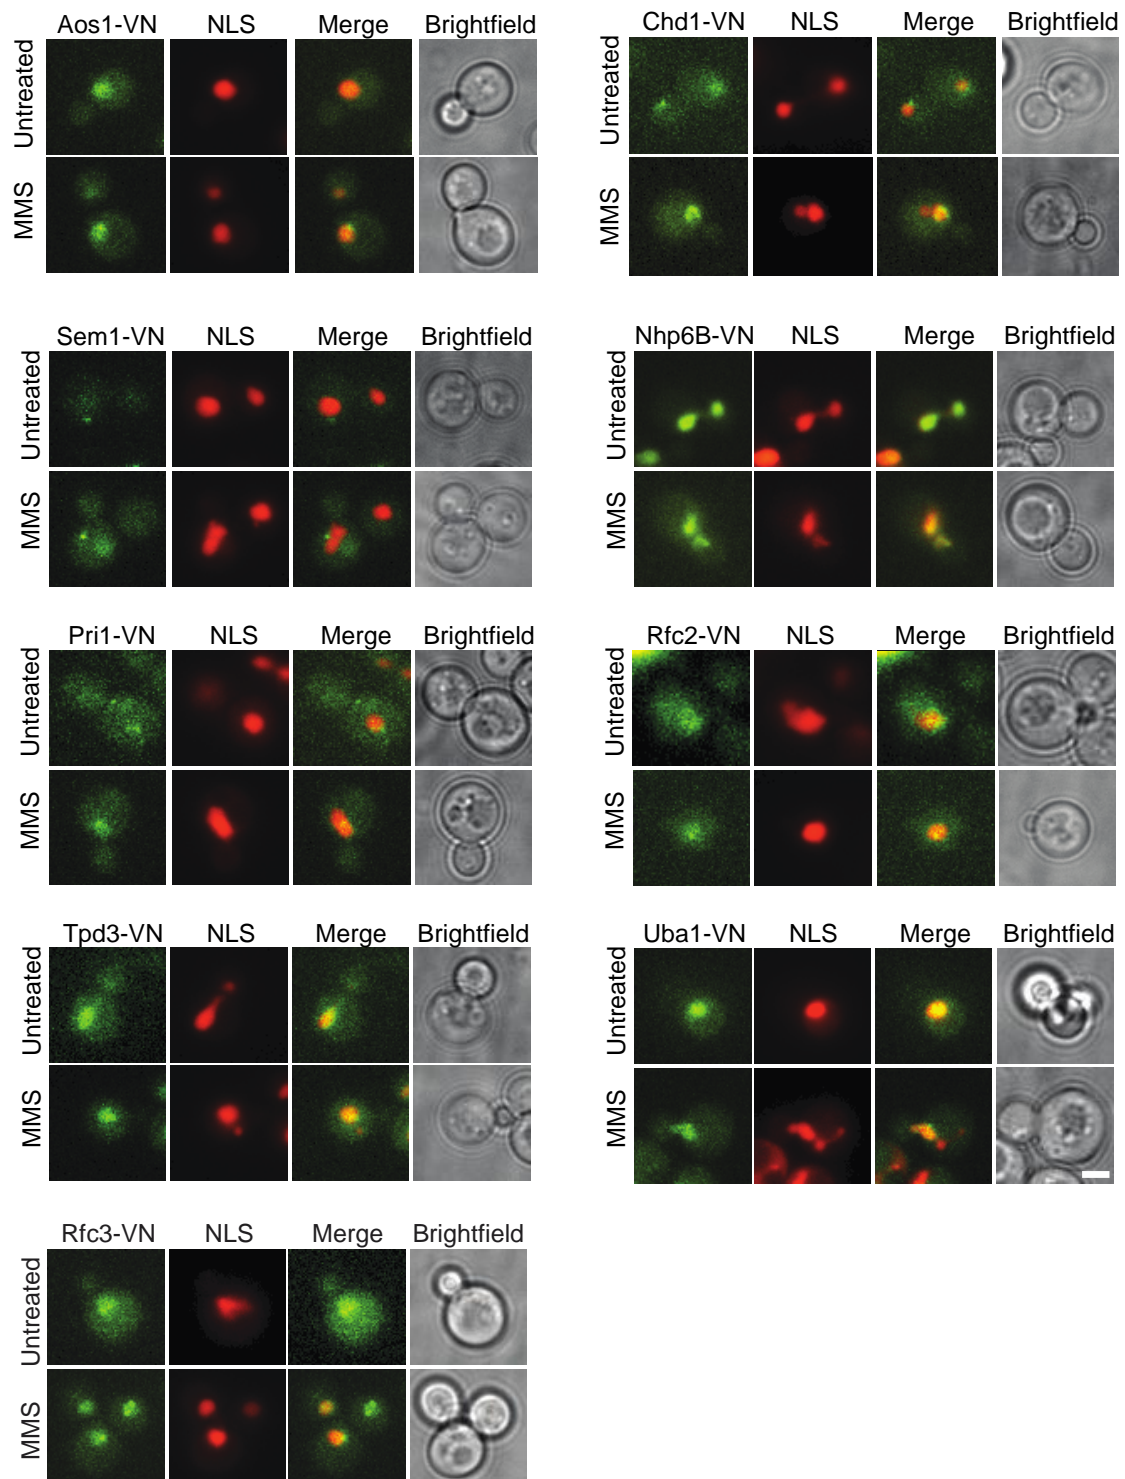

**Supplementary Figure 5: Cmr1 interactors from BiFC screen.** Examples of VC-VN interaction signals. Strains expressing Cmr1-VC, the indicated VN-fusion protein and NLS-yEmRFP were subjected to fluorescence microscopy before and after treatment with 0.05% MMS. Yellow fluorescent signal represents the VC-VN interaction. Scale bar is equal to 2  $\mu$ m.



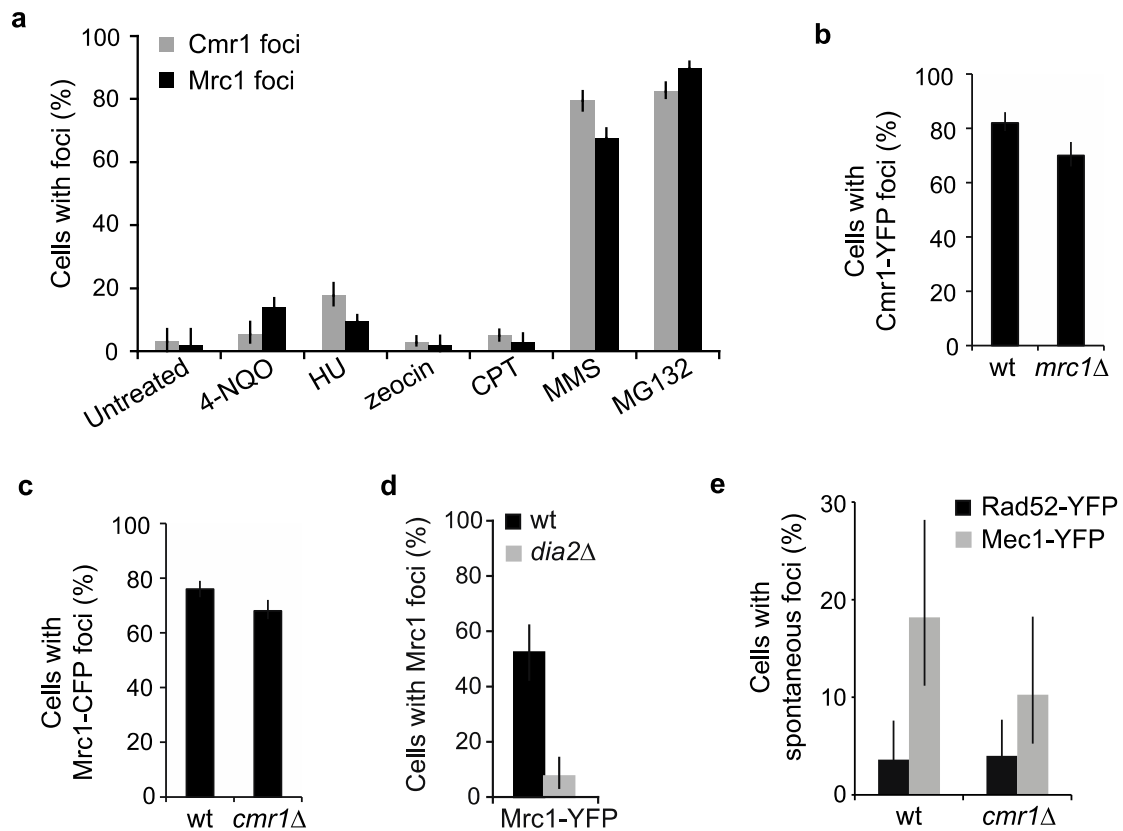

**Supplementary Figure 6: Cmr1 and Mrc1 form similar but independent foci.** (a)

Mrc1 and Cmr1 accumulates into nuclear foci in response to replication stress and proteasome inhibition. Endogenously tagged Mrc1-CFP and Cmr1-YFP localization was followed by fluorescence microscopy in haploid strains (IG148 and IG66) treated with DNA damaging agents and in untreated cells. Cells were grown to exponential phase and then treated with zeocin ( $200 \mu\text{g ml}^{-1}$ ), MMS (0.05%), CPT ( $5 \mu\text{g ml}^{-1}$ ), 4-NQO ( $0.2 \mu\text{g ml}^{-1}$ ), HU (200 mM) or MG132 ( $75 \mu\text{g ml}^{-1}$ ) for 2 hours. Percentage of cells containing foci was quantified. (b) Cmr1 foci are independent of Mrc1. Wild-type (IG66) and *mrc1Δ* (IG155-3A) strains expressing Cmr1-YFP were imaged after treatment with 0.05% MMS for 2 hours. (c) Mrc1 foci are independent of Cmr1. Wild-type (IG148) and *cmr1Δ* (IG154-7D) strains expressing Mrc1-CFP were imaged after treatment with 0.05% MMS for 2 hours (d) Dia2 is required for re-localization of Mrc1 to INQ. Mrc1-YFP focus formation was assessed by fluorescence microscopy in wild-type (IG147) and *dia2Δ* (CC37-5A) cells after treatment with MMS for 2 hours. (e) *cmr1Δ* does not result in increased spontaneous genomic instability. Spontaneous Mec1 and Rad52 foci were quantified in wild-type and *cmr1Δ* cells. Mec1 was tagged endogenously (ML41-4B and ML801-5B), while Rad52-YFP was expressed from the pWJ1213 plasmid (in ML8-9A and DP1). In

panels **a-e**, two-three independent experiments ( $n > 100$ ) were performed. Error bars represent 95% confidence intervals.

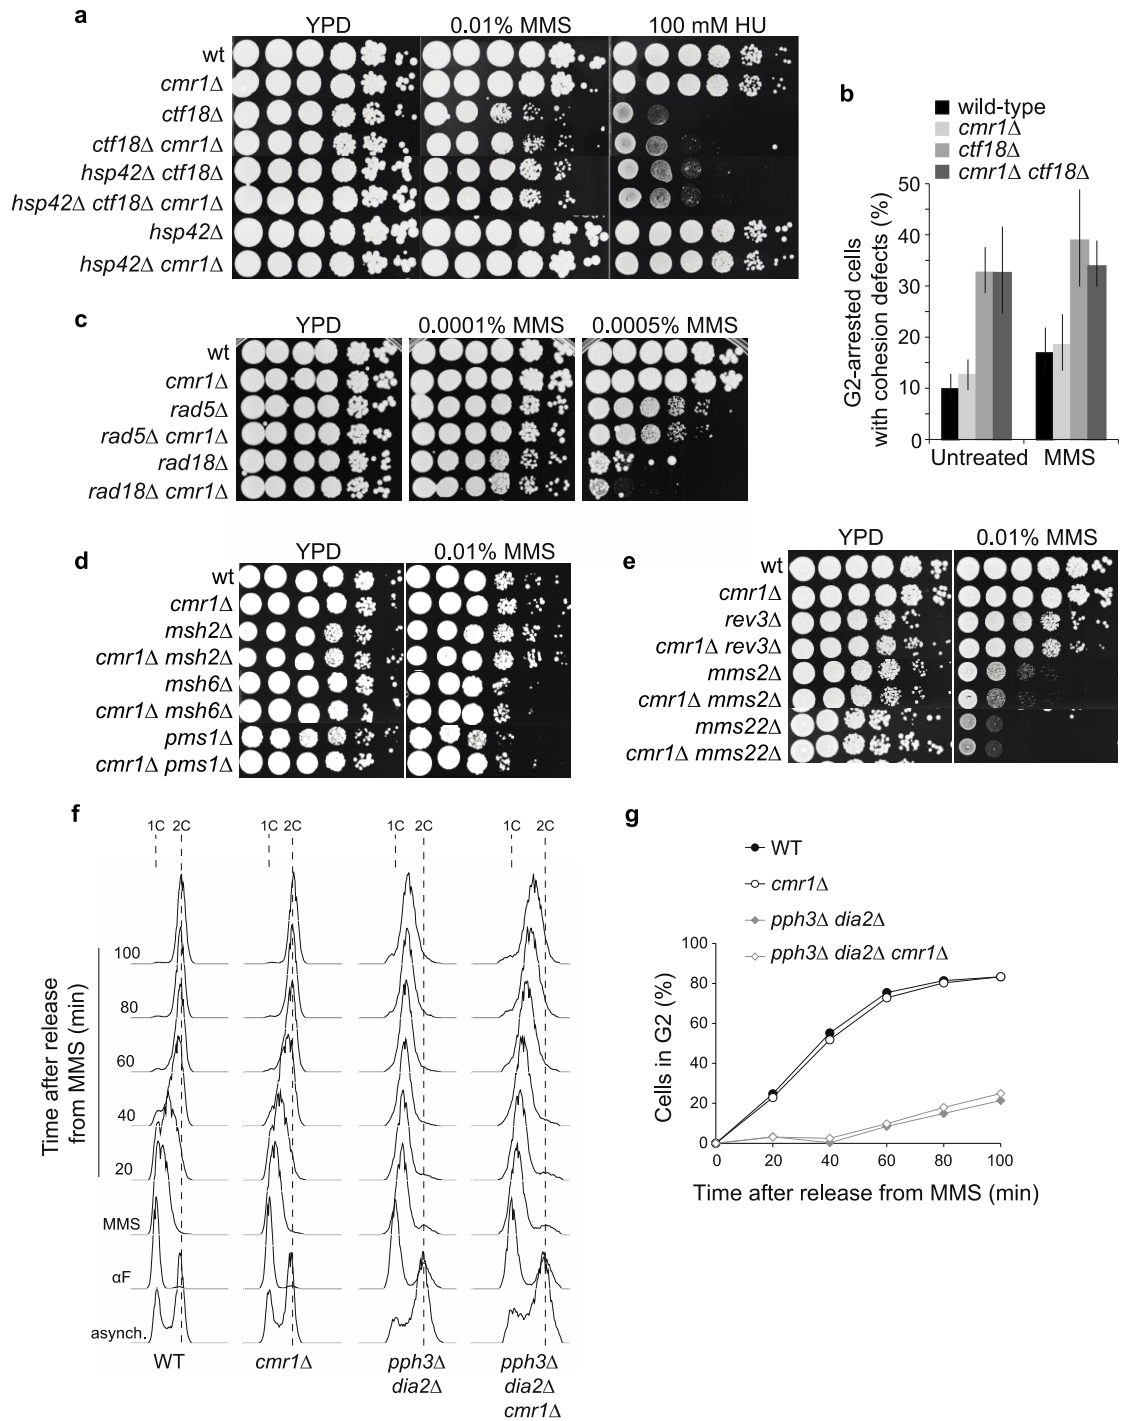

**Supplementary Figure 7: *CMR1* epistasis analysis.** (a) *cmr1*Δ is epistatic with *hsp42*Δ in suppressing MMS and HU sensitivity of the *ctf18*Δ mutant. Ten-fold serial dilutions for each of the indicated genotypes were plated on YPD or YPD containing the indicated drug. Strains were ML8-9A (wt), DP1 (*cmr1*Δ), IG177-9C (*ctf18*Δ), IG177-8C (*ctf18*Δ *cmr1*Δ), IG292-11B (*hsp42*Δ *ctf18*Δ), CC27-4C (*hsp42*Δ *ctf18*Δ *cmr1*Δ), IG237-18A (*hsp42*Δ) and IG237-17C (*hsp42*Δ *cmr1*Δ). (b) Cmr1 does not play a direct role in sister chromatid cohesion. Cells carrying *TetO* tandem repeats on

chromosome *V* and expressing TetR-RFP were arrested in G2 with nocodazole and the percentage of cells with precocious sister chromatid separation (2 RFP dots)<sup>3</sup> was quantified in wild-type (IG310-3B), *cmr1Δ* (IG310-15D), *ctf18Δ* (IG310-20B) and *cmr1Δ ctf18Δ* (IG311-1B) strains. At least 300 cells from two replicate experiments were analyzed for each strain. Error bars represent 95% confidence intervals. (c-e) Epistasis analysis of *cmr1Δ* with DNA repair pathways. Genetic interaction of *cmr1Δ* with mutants in template switching (c), mismatch repair (d), and postreplication repair and translesion synthesis (e). Ten-fold serial dilutions for each of the indicated genotypes were plated on YPD or YPD containing MMS. Strains were ML8-9A (wt), DP1 (*cmr1Δ*), CC25-4A (*rad5Δ*), CC25-1A (*rad5Δ cmr1Δ*), IG265-17A (*rad18Δ*), IG265-4D (*rad18Δ cmr1Δ*), *msh2Δ* (IG118-6C), *cmr1Δ msh2Δ* (IG118-17C), *msh6Δ* (IG119-4D), *cmr1Δ msh6Δ* (IG119-8D), *pms1Δ* (IG120-6B), *cmr1Δ pms1Δ* (IG120-2B), *rev3Δ* (IG190-1C), *cmr1Δ rev3Δ* (IG190-4D), *mms2Δ* (IG267-20D), *cmr1Δ mms2Δ* (IG267-9A), *mms22Δ* (IG260-2D), *cmr1Δ mms22Δ* (IG260-1D). (f) *cmr1Δ* mutant cells are proficient for replication restart after MMS treatment. Wild-type (CC44-8A), *cmr1Δ* (DP1), *dia2Δ pph3Δ* (IG296-2C), and *dia2Δ pph3Δ cmr1Δ* (IG296-49B) strains arrested in G1 with  $\alpha$ -factor were released into YPD containing 0.03% MMS for 45 min followed by release into YPD containing 15  $\mu\text{g ml}^{-1}$  nocodazole. Samples were harvested and stained with propidium iodide for flow cytometry analysis at the indicated time points. Representative profiles are shown. (g) Quantification of the percentage of cells in G2 phase at the individual time points following MMS-release in f. Graph shows average of 2-4 independent experiments.

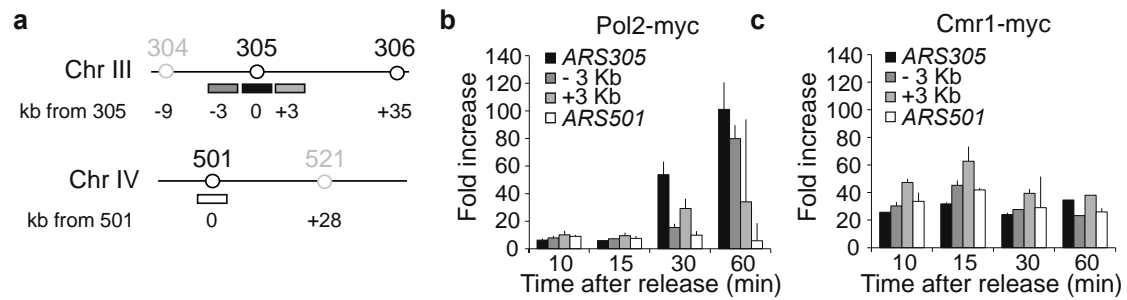

**Supplementary Figure 8: Cmr1 constitutively associates with chromatin.** (a) Schematic representation of genomic regions containing the early-firing origin ARS305 and late-firing origin ARS501. Boxes indicate qPCR probes location at ARS305 (black), -3 kb and +3 kb from ARS305 (grey) and at ARS501 (white). Inactive ARS are depicted in grey and distances from the ARS of interest are reported. (b-c) ChIP experiments were performed on myc-tagged Cmr1 (IG309) and Pol2 (LBy49) cells. G1-arrested cells were released in 0.2 M HU for the indicated times. The height of the bars represents the real-time PCR signal as fold increase of the IP over the beads-only control for Pol2 (b) and Cmr1 (c). Error bars represent the standard deviation of two to four replicates.

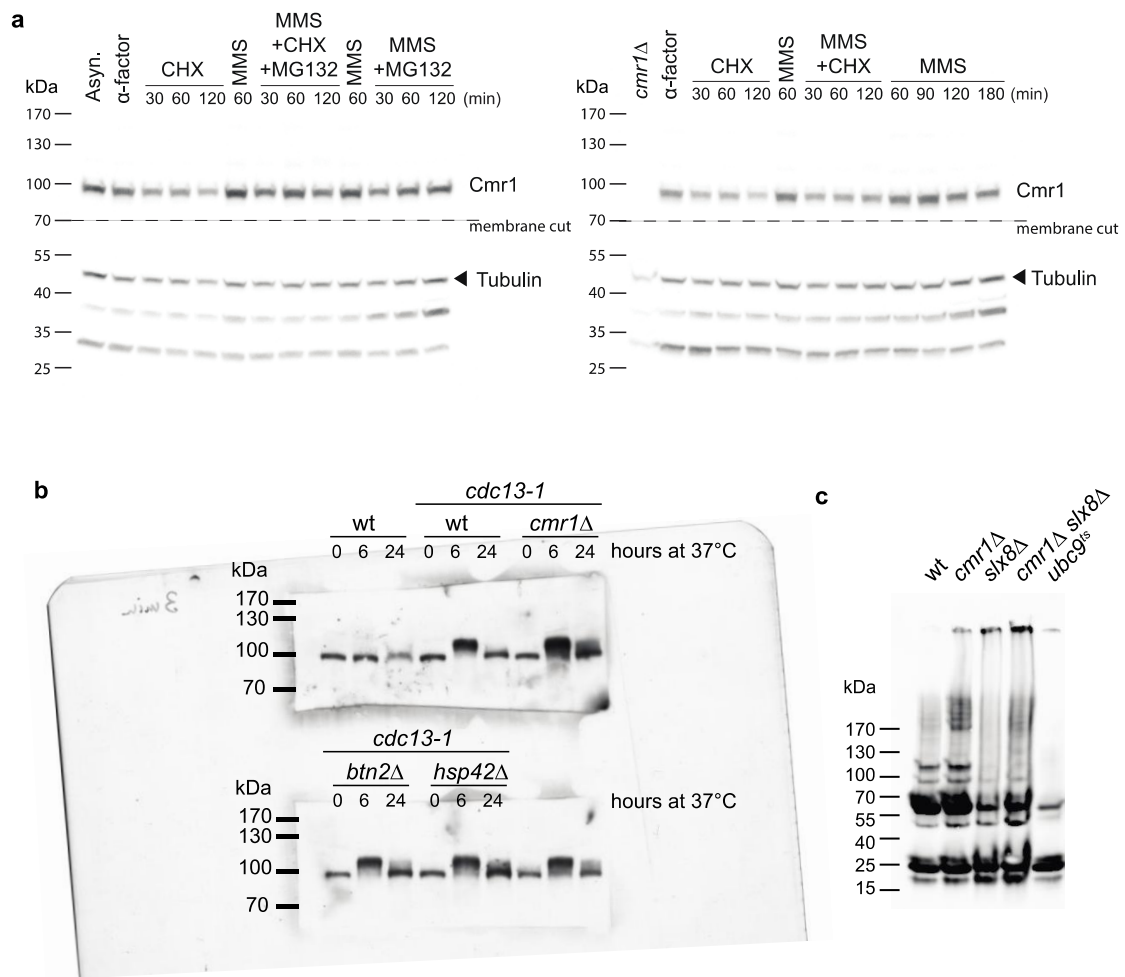

**Supplementary Figure 9: Uncropped immunoblots.** (a) Uncropped immunoblot of Fig. 3g. (b) Uncropped immunoblot of Fig. 6c. (c) Uncropped immunoblot of Fig. 6f.

**Supplementary tables:**

**Supplementary Table 1 Unique Cmr1 interactions from BiFC screen.** Hits in bold have been manually confirmed.

|             |              |               |              |             |           |
|-------------|--------------|---------------|--------------|-------------|-----------|
| Adk1        | <b>Gim5</b>  | Lsm4          | <b>Rfc3</b>  | Stf2        | Ymr122w-A |
| <b>Aos1</b> | Gir2         | <b>Mcm3</b>   | <b>Rnr4</b>  | Sto1        | Ylr296w   |
| Aro4        | Gmp1         | Med8          | <b>Rod1</b>  | Tfb4        | Ymr221c   |
| <b>Bmh1</b> | Grx1         | Mtf1          | Rpb3         | Tma17       | Ynl134c   |
| Cdc60       | Grx8         | Mti1          | Rpb8         | <b>Tpd3</b> | Ypl245w   |
| <b>Chd1</b> | Gsp2         | <b>Nhp6B</b>  | Rpc10        | Tpo1        | Ypr1      |
| Cpa2        | <b>Hsc82</b> | <b>Nup133</b> | Rpp2A        | <b>Uba1</b> | Ypt31     |
| Cpr6        | <b>Hsp26</b> | Nut2          | Rri2         | Uga1        | Ypt32     |
| Crs5        | Hxk1         | Osw1          | Rsb1         | Utp10       | Zuo1      |
| Cyc2        | Hxk2         | Pbi2          | <b>Sem1</b>  | Ybr085c-A   |           |
| Dot5        | Idi1         | Pml39         | <b>Sgf11</b> | Ydr387c     |           |
| Egd2        | Ils1         | <b>Pri1</b>   | Smx3         | Yel047c     |           |
| Gad1        | Ipp1         | Ras2          | <b>Snf6</b>  | Yjl216c     |           |
| Gdi1        | <b>Ixr1</b>  | <b>Rfc2</b>   | Sod1         | Ylr363w-A   |           |

**Supplementary Table 2 Manually curated *CMRI* genetic interactions in replication stress.** -/+, 10-fold. - /+ +, 100-fold. Strains are listed in Supplementary Table 5.

| <b>Positive interactions</b>      |                               |                         |
|-----------------------------------|-------------------------------|-------------------------|
| Mutation                          | Functions                     | Strength of interaction |
| <i>pph3Δ</i>                      | S-phase replication           | +                       |
| <i>mrc1Δ</i>                      | checkpoint and sister         | +                       |
| <i>ctf18Δ</i>                     | chromatid cohesion            | ++                      |
| <i>scc1-73</i>                    |                               | +                       |
| <i>mrc1AQ</i>                     | Replication checkpoint        | ++                      |
| <i>mlp1Δ mlp2Δ</i>                | Myosin-like proteins          | +                       |
| <b>Negative interactions</b>      |                               |                         |
| Mutation                          | Functions                     | Strength of interaction |
| <i>rad52Δ</i>                     | Homologous                    | - -                     |
| <i>mre11Δ</i>                     | recombination                 | - -                     |
| <i>rad9Δ</i>                      | DNA damage checkpoint         | -                       |
| <i>rad18Δ</i>                     | E3-ligase-dependent           | -                       |
| <i>slx8Δ</i>                      | proteasomal degradation       | - -                     |
| <i>dia2Δ</i>                      | and SUMO-dependent            | -                       |
| <i>hel2Δ</i>                      | proteasomal degradation       | -                       |
| <b>No interaction (epistatic)</b> |                               |                         |
| Mutation                          | Functions                     |                         |
| <i>csm3Δ</i>                      | Replication fork stability    |                         |
| <i>tof1Δ</i>                      |                               |                         |
| <i>dcc1Δ</i>                      |                               |                         |
| <i>elg1Δ</i>                      |                               |                         |
| <i>rad24Δ</i>                     | Checkpoint                    |                         |
| <i>hta1-S129A hta2-S129A</i>      |                               |                         |
| <i>msh2Δ</i>                      | Mismatch repair               |                         |
| <i>msh6Δ</i>                      |                               |                         |
| <i>msh3Δ</i>                      |                               |                         |
| <i>pms1Δ</i>                      |                               |                         |
| <i>exo1Δ</i>                      |                               |                         |
| <i>rad59Δ</i>                     | Regulation of homologous      |                         |
| <i>shu1Δ</i>                      | recombination                 |                         |
| <i>srs2Δ</i>                      |                               |                         |
| <i>hdf1Δ</i>                      | Non-homologous end<br>joining |                         |
| <i>rad27Δ</i>                     | DNA replication               |                         |
| <i>rad10Δ</i>                     | NER                           |                         |
| <i>rad14Δ</i>                     |                               |                         |
| <i>rev3Δ</i>                      | TLS                           |                         |
| <i>rad5Δ</i>                      | Template switching            |                         |
| <i>apn1Δ</i>                      | BER                           |                         |
| <i>mms21-11</i>                   | Post-replication repair       |                         |
| <i>mms22Δ</i>                     |                               |                         |
| <i>mms2Δ</i>                      |                               |                         |
| <i>ubp10Δ</i>                     | Ubiquitin-dependent           |                         |



|               |                           |
|---------------|---------------------------|
| <i>abc4Δ</i>  | degradation               |
| <i>btn2Δ</i>  | Unfolded protein response |
| <i>hsp42Δ</i> |                           |

**Supplementary Table 3 *CMR1* genetic interactions from SGA screen.** Positive and negative *cmr1Δ* genetic interactions in presence of HU are listed. Hits are ranked by normalized ratio between the growth of comparer/experimental. Cut-off is set at 0.25 for the positive genetic interactions and at 1.50 for the negative genetic interactions.

| <b>Positive genetic interactions</b> |       |          |          |                                          |                               |
|--------------------------------------|-------|----------|----------|------------------------------------------|-------------------------------|
| ID Column                            | Gene  | P-Value  | Z-Score  | Normalized Growth Ratio (Comparer:: Exp) | Growth Ratio (Comparer / Exp) |
| YNL052W                              | COX5A | 7.08E-07 | -4.95912 | 0.10::1.36                               | 0.07                          |
| YEL024W                              | RIP1  | 1.70E-06 | -4.78666 | 0.10::1.24                               | 0.08                          |
| YPL216W                              | -     | 1.06E-06 | -4.87924 | 0.10::1.30                               | 0.08                          |
| YNL116W                              | DMA2  | 1.06E-06 | -4.87983 | 0.10::1.30                               | 0.08                          |
| YBR066C                              | NRG2  | 2.62E-06 | -4.6986  | 0.10::1.18                               | 0.08                          |
| YML027W                              | YOX1  | 1.04E-06 | -4.88446 | 0.10::1.31                               | 0.08                          |
| YPL201C                              | YIG1  | 4.33E-06 | -4.5947  | 0.10::1.12                               | 0.09                          |
| YNL032W                              | SIW14 | 7.06E-06 | -4.49185 | 0.10::1.06                               | 0.09                          |
| YIL103W                              | DPH1  | 4.76E-06 | -4.57525 | 0.10::1.11                               | 0.09                          |
| YNR027W                              | BUD17 | 6.94E-06 | -4.49545 | 0.10::1.06                               | 0.09                          |
| YBR125C                              | PTC4  | 4.65E-06 | -4.57984 | 0.10::1.11                               | 0.09                          |
| YBR288C                              | APM3  | 5.43E-06 | -4.54747 | 0.10::1.09                               | 0.09                          |
| YDR443C                              | SSN2  | 2.74E-06 | -4.68911 | 0.10::1.18                               | 0.09                          |
| YLR237W                              | THI7  | 2.91E-06 | -4.67729 | 0.10::1.17                               | 0.09                          |
| YHR132W-A                            | IGO2  | 6.17E-06 | -4.52045 | 0.10::1.07                               | 0.09                          |
| YLR390W-A                            | CCW14 | 3.62E-06 | -4.63219 | 0.10::1.14                               | 0.09                          |
| YBR180W                              | DTR1  | 1.41E-05 | -4.3422  | 0.10::0.98                               | 0.1                           |
| YIL113W                              | SDP1  | 1.52E-05 | -4.32612 | 0.10::0.97                               | 0.1                           |
| YNL056W                              | OCA2  | 9.07E-06 | -4.43823 | 0.10::1.03                               | 0.1                           |
| YBR028C                              | YPK3  | 1.46E-05 | -4.33399 | 0.10::0.97                               | 0.1                           |
| YNL040W                              | -     | 1.09E-05 | -4.3995  | 0.10::1.01                               | 0.1                           |
| YBR020W                              | GAL1  | 1.18E-05 | -4.38047 | 0.10::1.00                               | 0.1                           |
| YNL008C                              | ASI3  | 8.65E-06 | -4.4485  | 0.10::1.03                               | 0.1                           |
| YNL046W                              | -     | 1.65E-05 | -4.30765 | 0.10::0.96                               | 0.1                           |
| YIR002C                              | MPH1  | 1.59E-05 | -4.31559 | 0.10::0.96                               | 0.1                           |
| YNL122C                              | -     | 1.32E-05 | -4.35737 | 0.10::0.98                               | 0.1                           |
| YIL110W                              | HPM1  | 1.13E-05 | -4.39013 | 0.15::1.49                               | 0.1                           |
| YDL089W                              | NUR1  | 1.01E-05 | -4.41433 | 0.10::1.01                               | 0.1                           |

|           |        |            |          |            |      |
|-----------|--------|------------|----------|------------|------|
| YBR129C   | OPY1   | 1.60E-05   | -4.31377 | 0.10::0.96 | 0.1  |
| YBL102W   | SFT2   | 1.86E-05   | -4.28094 | 0.10::0.94 | 0.11 |
| YBR052C   | RFS1   | 2.39E-05   | -4.22496 | 0.10::0.92 | 0.11 |
| YNL123W   | NMA111 | 2.99E-05   | -4.17438 | 0.10::0.89 | 0.11 |
| YDR496C   | PUF6   | 2.34E-05   | -4.22996 | 0.10::0.92 | 0.11 |
| YDL019C   | OSH2   | 3.03E-05   | -4.17138 | 0.10::0.89 | 0.11 |
| YDR491C   | -      | 3.25E-05   | -4.15523 | 0.10::0.88 | 0.11 |
| YJL161W   | FMP33  | 4.26E-05   | -4.09287 | 0.10::0.85 | 0.12 |
| YDL026W   | -      | 5.01E-05   | -4.05526 | 0.10::0.84 | 0.12 |
| YBR165W   | UBS1   | 6.78E-05   | -3.98373 | 0.10::0.81 | 0.12 |
| YDR488C   | PAC11  | 3.88E-05   | -4.11478 | 0.10::0.86 | 0.12 |
| YBL096C   | -      | 9.00E-05   | -3.91616 | 0.15::1.15 | 0.13 |
| YBR019C   | GAL10  | 7.34E-05   | -3.96511 | 0.10::0.80 | 0.13 |
| YIL170W   | -      | 8.20E-05   | -3.9385  | 0.15::1.20 | 0.13 |
| YKR095W   | MLP1   | 7.63E-05   | -3.95565 | 0.10::0.79 | 0.13 |
| YGR089W   | NNF2   | 0.00045682 | -3.50487 | 0.10::0.62 | 0.16 |
| YBR130C   | SHE3   | 0.00081044 | -3.3492  | 0.27::1.55 | 0.17 |
| YDL036C   | PUS9   | 0.00078108 | -3.35942 | 0.10::0.58 | 0.17 |
| YJL016W   | -      | 0.00093962 | -3.30801 | 0.24::1.34 | 0.18 |
| YNL139C   | THO2   | 0.0010305  | -3.28206 | 0.10::0.55 | 0.18 |
| YML121W   | GTR1   | 0.00151124 | -3.17252 | 0.31::1.59 | 0.19 |
| YKR010C   | TOF2   | 0.00153288 | -3.16838 | 0.10::0.52 | 0.19 |
| YBR073W   | RDH54  | 0.00138644 | -3.19746 | 0.10::0.53 | 0.19 |
| YAR002C-A | ERP1   | 0.0016675  | -3.14383 | 0.22::1.12 | 0.19 |
| YBR010W   | HHT1   | 0.00168184 | -3.14133 | 0.10::0.51 | 0.19 |
| YNL273W   | TOF1   | 0.0022438  | -3.0559  | 0.10::0.49 | 0.2  |
| YJL206C   | -      | 0.0021178  | -3.0732  | 0.10::0.49 | 0.2  |
| YHR168W   | MTG2   | 0.00296    | -2.97186 | 0.14::0.66 | 0.21 |
| YKR096W   | ESL2   | 0.0025194  | -3.02101 | 0.29::1.42 | 0.21 |
| YDL039C   | PRM7   | 0.0025504  | -3.01731 | 0.28::1.37 | 0.21 |
| YBR043C   | QDR3   | 0.0039566  | -2.88161 | 0.12::0.55 | 0.22 |
| YDL093W   | PMT5   | 0.0034564  | -2.92394 | 0.26::1.17 | 0.22 |
| YMR191W   | SPG5   | 0.0032284  | -2.94511 | 0.24::1.11 | 0.22 |
| YDR474C   | -      | 0.0039456  | -2.88248 | 0.10::0.45 | 0.22 |
| YIL076W   | SEC28  | 0.0048864  | -2.81443 | 0.18::0.76 | 0.23 |
| YIL112W   | HOS4   | 0.0045192  | -2.83944 | 0.31::1.37 | 0.23 |
| YIL152W   | -      | 0.0042596  | -2.85827 | 0.10::0.44 | 0.23 |

---

### Negative genetic interactions

---

| ID      | Column | Gene | P-Value  | Z-Score | Normalized                     |                                  |
|---------|--------|------|----------|---------|--------------------------------|----------------------------------|
|         |        |      |          |         | Growth Ratio (Compared to Exp) | Growth Ratio (Compared to / Exp) |
| YGR168C | -      | -    | 1.19E-07 | 5.29509 | 1.79::0.10                     | 17.94                            |
| YER186C | -      | -    | 3.42E-07 | 5.09875 | 1.61::0.10                     | 16.15                            |
| YNL107W | YAF9   | YAF9 | 6.10E-07 | 4.98818 | 1.52::0.10                     | 15.22                            |
| YPL212C | PUS1   | PUS1 | 6.33E-07 | 4.98094 | 1.52::0.10                     | 15.16                            |
| YGL124C | MON1   | MON1 | 7.00E-07 | 4.96137 | 1.50::0.10                     | 15                               |

|           |        |            |         |            |       |
|-----------|--------|------------|---------|------------|-------|
| YPL208W   | RKM1   | 7.81E-07   | 4.94013 | 1.48::0.10 | 14.83 |
| YDL149W   | ATG9   | 1.36E-06   | 4.83047 | 1.40::0.10 | 13.98 |
| YER011W   | TIR1   | 2.05E-06   | 4.74883 | 1.34::0.10 | 13.38 |
| YDR410C   | STE14  | 2.10E-06   | 4.74324 | 1.33::0.10 | 13.34 |
| YDL041W   | -      | 2.13E-06   | 4.7404  | 1.33::0.10 | 13.32 |
| YKR035C   | OPI8   | 2.48E-06   | 4.71002 | 1.31::0.10 | 13.11 |
| YPR120C   | CLB5   | 3.36E-06   | 4.64772 | 1.27::0.10 | 12.68 |
| YDR074W   | TPS2   | 4.48E-06   | 4.5877  | 1.23::0.10 | 12.28 |
| YBR127C   | VMA2   | 5.95E-06   | 4.52809 | 1.19::0.10 | 11.89 |
| YPR064W   | -      | 7.31E-06   | 4.48446 | 1.16::0.10 | 11.62 |
| YGR063C   | SPT4   | 7.79E-06   | 4.47098 | 1.15::0.10 | 11.53 |
| YBR084C-A | RPL19A | 8.73E-06   | 4.44634 | 1.14::0.10 | 11.38 |
| YLR435W   | TSR2   | 9.53E-06   | 4.42761 | 1.19::0.11 | 11.27 |
| YGR159C   | NSR1   | 9.68E-06   | 4.42428 | 1.12::0.10 | 11.25 |
| YMR198W   | CIK1   | 1.05E-05   | 4.4061  | 1.11::0.10 | 11.14 |
| YBL100C   | -      | 1.16E-05   | 4.38495 | 1.10::0.10 | 11.01 |
| YIL121W   | QDR2   | 1.16E-05   | 4.38495 | 1.10::0.10 | 11.01 |
| YJL200C   | ACO2   | 1.22E-05   | 4.37377 | 1.09::0.10 | 10.95 |
| YDR484W   | VPS52  | 1.24E-05   | 4.37069 | 1.09::0.10 | 10.93 |
| YPL268W   | PLC1   | 1.24E-05   | 4.37108 | 1.09::0.10 | 10.93 |
| YOR270C   | VPH1   | 1.51E-05   | 4.32775 | 1.07::0.10 | 10.68 |
| YNL315C   | ATP11  | 1.67E-05   | 4.30475 | 1.05::0.10 | 10.55 |
| YPL180W   | TCO89  | 1.78E-05   | 4.2914  | 1.05::0.10 | 10.47 |
| YIL116W   | HIS5   | 1.83E-05   | 4.2842  | 1.04::0.10 | 10.43 |
| YBL099W   | ATP1   | 1.85E-05   | 4.28185 | 1.04::0.10 | 10.42 |
| YDL157C   | -      | 2.15E-05   | 4.24867 | 1.02::0.10 | 10.24 |
| YBR189W   | RPS9B  | 2.45E-05   | 4.21957 | 1.01::0.10 | 10.08 |
| YKR019C   | IRS4   | 2.45E-05   | 4.21957 | 1.01::0.10 | 10.08 |
| YDL090C   | RAM1   | 2.53E-05   | 4.21221 | 1.00::0.10 | 10.04 |
| YHL005C   | -      | 2.59E-05   | 4.20655 | 1.00::0.10 | 10.01 |
| YGR056W   | RSC1   | 2.78E-05   | 4.19095 | 0.99::0.10 | 9.93  |
| YDL020C   | RPN4   | 2.96E-05   | 4.17661 | 0.98::0.10 | 9.85  |
| YHR005C   | GPA1   | 3.26E-05   | 4.15416 | 0.97::0.10 | 9.73  |
| YDR048C   | -      | 3.31E-05   | 4.15136 | 0.97::0.10 | 9.72  |
| YDR234W   | LYS4   | 3.55E-05   | 4.13515 | 0.96::0.10 | 9.63  |
| YLR192C   | HCR1   | 3.63E-05   | 4.13017 | 0.96::0.10 | 9.61  |
| YNL041C   | COG6   | 3.84E-05   | 4.11694 | 0.95::0.10 | 9.54  |
| YDL042C   | SIR2   | 3.92E-05   | 4.11229 | 0.95::0.10 | 9.52  |
| YNR037C   | RSM19  | 4.57E-05   | 4.07662 | 0.93::0.10 | 9.34  |
| YPR139C   | LOA1   | 5.41E-05   | 4.0372  | 0.91::0.10 | 9.14  |
| YKL204W   | EAP1   | 6.41E-05   | 3.99707 | 1.44::0.16 | 8.95  |
| YNL138W   | SRV2   | 6.45E-05   | 3.99581 | 0.89::0.10 | 8.94  |
| YJL101C   | GSH1   | 8.23E-05   | 3.93755 | 0.87::0.10 | 8.66  |
| YLR358C   | -      | 8.28E-05   | 3.93614 | 0.87::0.10 | 8.66  |
| YIR009W   | MSL1   | 8.48E-05   | 3.93035 | 0.86::0.10 | 8.63  |
| YBR058C   | UBP14  | 8.58E-05   | 3.92751 | 0.86::0.10 | 8.62  |
| YJL175W   | -      | 9.78E-05   | 3.89591 | 0.85::0.10 | 8.47  |
| YBR081C   | SPT7   | 0.00011076 | 3.86573 | 0.83::0.10 | 8.34  |
| YDL156W   | CMR1   | 0.00011610 | 3.8542  | 0.83::0.10 | 8.29  |
| YOL004W   | SIN3   | 0.00014089 | 3.80659 | 0.81::0.10 | 8.08  |

|           |        |            |         |            |      |
|-----------|--------|------------|---------|------------|------|
| YNR052C   | POP2   | 0.00014549 | 3.79864 | 0.80::0.10 | 8.04 |
| YGL107C   | RMD9   | 0.00015094 | 3.78951 | 0.80::0.10 | 8    |
| YCL037C   | SRO9   | 0.00017027 | 3.75947 | 0.79::0.10 | 7.88 |
| YBR163W   | EXO5   | 0.00019463 | 3.72589 | 0.77::0.10 | 7.74 |
| YIL154C   | IMP2'  | 0.00020706 | 3.71025 | 0.77::0.10 | 7.67 |
| YGL033W   | HOP2   | 0.00022264 | 3.69183 | 0.76::0.10 | 7.6  |
| YDR497C   | ITR1   | 0.00023218 | 3.68116 | 0.76::0.10 | 7.55 |
| YBL006C   | LDB7   | 0.0002503  | 3.66196 | 0.75::0.10 | 7.48 |
| YDR512C   | EMI1   | 0.0002538  | 3.65839 | 0.75::0.10 | 7.46 |
| YLR337C   | VRP1   | 0.00027766 | 3.63531 | 0.74::0.10 | 7.37 |
| YDR266C   | HEL2   | 0.00028102 | 3.6322  | 0.74::0.10 | 7.36 |
| YNR010W   | CSE2   | 0.0002796  | 3.63349 | 0.74::0.10 | 7.36 |
| YLR021W   | IRC25  | 0.00035296 | 3.57297 | 0.71::0.10 | 7.13 |
| YGR155W   | CYS4   | 0.00043012 | 3.52088 | 0.69::0.10 | 6.93 |
| YJR055W   | HIT1   | 0.0004502  | 3.50876 | 1.11::0.16 | 6.89 |
| YKL139W   | CTK1   | 0.0004829  | 3.49007 | 1.11::0.16 | 6.82 |
| YDR159W   | SAC3   | 0.00049082 | 3.48572 | 0.68::0.10 | 6.8  |
| YNL073W   | MSK1   | 0.00057682 | 3.44229 | 0.66::0.10 | 6.64 |
| YLR382C   | NAM2   | 0.00060316 | 3.43019 | 1.11::0.17 | 6.6  |
| YPR087W   | VPS69  | 0.00077534 | 3.36145 | 0.64::0.10 | 6.36 |
| YJL151C   | SNA3   | 0.000797   | 3.35383 | 1.10::0.17 | 6.34 |
| YBR131W   | CCZ1   | 0.00089938 | 3.32025 | 1.60::0.26 | 6.22 |
| YLR421C   | RPN13  | 0.00098774 | 3.29399 | 1.14::0.19 | 6.14 |
| YNR006W   | VPS27  | 0.00109812 | 3.2641  | 0.60::0.10 | 6.04 |
| YLR404W   | FLD1   | 0.0011177  | 3.25909 | 1.33::0.22 | 6.02 |
| YPR024W   | YME1   | 0.00123894 | 3.22976 | 0.59::0.10 | 5.93 |
| YMR116C   | ASC1   | 0.0017358  | 3.13207 | 0.56::0.10 | 5.63 |
| YLR025W   | SNF7   | 0.0017455  | 3.13043 | 0.56::0.10 | 5.62 |
| YPL181W   | CTI6   | 0.0020524  | 3.08255 | 0.76::0.14 | 5.48 |
| YBR082C   | UBC4   | 0.0023808  | 3.0381  | 0.99::0.18 | 5.35 |
| YKL080W   | VMA5   | 0.0024226  | 3.03284 | 0.53::0.10 | 5.34 |
| YDR463W   | STP1   | 0.0024182  | 3.0334  | 1.07::0.20 | 5.34 |
| YOR058C   | ASE1   | 0.0029132  | 2.97676 | 0.52::0.10 | 5.18 |
| YML071C   | COG8   | 0.0030496  | 2.96269 | 0.51::0.10 | 5.14 |
| YLR320W   | MMS22  | 0.0034974  | 2.92026 | 0.50::0.10 | 5.02 |
| YOR141C   | ARP8   | 0.003995   | 2.87856 | 0.49::0.10 | 4.91 |
| YGR064W   | -      | 0.0044256  | 2.84611 | 0.48::0.10 | 4.83 |
| YML014W   | TRM9   | 0.00463    | 2.83171 | 0.48::0.10 | 4.79 |
| YAL035W   | FUN12  | 0.0048182  | 2.81895 | 0.48::0.10 | 4.76 |
| YMR125W   | STO1   | 0.005162   | 2.79674 | 0.47::0.10 | 4.7  |
| YLR193C   | UPS1   | 0.005377   | 2.78354 | 0.47::0.10 | 4.67 |
| YNL252C   | MRPL17 | 0.0055106  | 2.77556 | 0.66::0.14 | 4.65 |
| YHL033C   | RPL8A  | 0.005772   | 2.76046 | 0.46::0.10 | 4.61 |
| YBR030W   | RKM3   | 0.006388   | 2.72717 | 0.85::0.19 | 4.53 |
| YNL292W   | PUS4   | 0.006571   | 2.71784 | 0.71::0.16 | 4.51 |
| YOR147W   | MDM32  | 0.007423   | 2.67724 | 0.62::0.14 | 4.41 |
| YFR025C   | HIS2   | 0.0074706  | 2.67511 | 0.44::0.10 | 4.4  |
| YDL045W-A | MRP10  | 0.0083628  | 2.63706 | 0.97::0.23 | 4.32 |
| YOR096W   | RPS7A  | 0.0084088  | 2.6352  | 0.49::0.11 | 4.31 |
| YHR012W   | VPS29  | 0.0088146  | 2.61916 | 0.43::0.10 | 4.27 |

|         |        |           |         |            |      |
|---------|--------|-----------|---------|------------|------|
| YGL243W | TAD1   | 0.0106718 | 2.55327 | 1.85::0.45 | 4.13 |
| YGL219C | MDM34  | 0.0119464 | 2.51373 | 0.40::0.10 | 4.04 |
| YDR431W | -      | 0.0125    | 2.49771 | 0.65::0.16 | 4    |
| YDR456W | NHX1   | 0.012712  | 2.49174 | 0.40::0.10 | 3.99 |
| YNL021W | HDA1   | 0.0131938 | 2.4785  | 1.06::0.27 | 3.96 |
| YBR045C | GIP1   | 0.0136422 | 2.46655 | 1.09::0.28 | 3.94 |
| YAL013W | DEP1   | 0.0140212 | 2.45672 | 0.39::0.10 | 3.92 |
| YGR204W | ADE3   | 0.0146034 | 2.44207 | 0.39::0.10 | 3.89 |
| YLR228C | ECM22  | 0.0157458 | 2.41475 | 1.50::0.39 | 3.83 |
| YDR076W | RAD55  | 0.0173694 | 2.37879 | 0.41::0.11 | 3.76 |
| YMR048W | CSM3   | 0.0176264 | 2.37337 | 1.19::0.32 | 3.75 |
| YNR036C | MRPS12 | 0.021604  | 2.29726 | 1.08::0.30 | 3.6  |
| YLR405W | DUS4   | 0.0218    | 2.29383 | 1.37::0.38 | 3.59 |
| YPL055C | LGE1   | 0.021692  | 2.29573 | 0.36::0.10 | 3.59 |
| YJL160C | -      | 0.022234  | 2.28634 | 0.93::0.26 | 3.58 |
| YNL315C | ATP11  | 0.025482  | 2.23402 | 0.35::0.10 | 3.48 |
| YNL051W | COG5   | 0.027548  | 2.20365 | 1.14::0.33 | 3.42 |
| YNL111C | CYB5   | 0.027544  | 2.20371 | 0.94::0.28 | 3.42 |
| YBR016W | -      | 0.028172  | 2.19488 | 1.39::0.41 | 3.4  |
| YLR110C | CCW12  | 0.028714  | 2.18739 | 1.04::0.31 | 3.39 |
| YNL250W | RAD50  | 0.029366  | 2.17853 | 0.53::0.16 | 3.38 |
| YGL258W | VEL1   | 0.03056   | 2.16277 | 1.10::0.33 | 3.35 |
| YDL069C | CBS1   | 0.03793   | 2.07562 | 1.20::0.38 | 3.19 |
| YJL159W | HSP150 | 0.039596  | 2.05795 | 1.04::0.33 | 3.16 |
| YML041C | VPS71  | 0.039594  | 2.05796 | 0.92::0.29 | 3.16 |
| YPL182C | -      | 0.042964  | 2.02406 | 0.31::0.10 | 3.11 |
| YIL166C | -      | 0.042912  | 2.02457 | 1.04::0.33 | 3.11 |
| YDR506C | GMC1   | 0.044696  | 2.0075  | 1.06::0.34 | 3.08 |
| YKL081W | TEF4   | 0.045414  | 2.0008  | 0.33::0.11 | 3.07 |
| YGL257C | MNT2   | 0.04544   | 2.00056 | 1.67::0.54 | 3.07 |
| YDL006W | PTC1   | 0.045398  | 2.00095 | 1.00::0.33 | 3.07 |
| YBR121C | GRS1   | 0.045962  | 1.99575 | 1.20::0.39 | 3.06 |
| YLR006C | SSK1   | 0.05075   | 1.95359 | 0.38::0.13 | 2.99 |
| YHL020C | OPI1   | 0.05207   | 1.94256 | 1.21::0.41 | 2.97 |
| YIL052C | RPL34B | 0.052492  | 1.93908 | 0.30::0.10 | 2.97 |
| YPL144W | POC4   | 0.05444   | 1.92332 | 0.29::0.10 | 2.94 |
| YDR181C | SAS4   | 0.055594  | 1.9142  | 1.88::0.64 | 2.93 |
| YPL065W | VPS28  | 0.056928  | 1.90386 | 0.53::0.18 | 2.91 |
| YPL101W | ELP4   | 0.05766   | 1.89827 | 1.09::0.37 | 2.9  |
| YBR231C | SWC5   | 0.059258  | 1.88628 | 0.29::0.10 | 2.89 |
| YGL064C | MRH4   | 0.059724  | 1.88283 | 0.39::0.14 | 2.88 |
| YBR095C | RXT2   | 0.063216  | 1.85767 | 1.32::0.46 | 2.84 |
| YDR432W | NPL3   | 0.064902  | 1.84594 | 0.28::0.10 | 2.82 |
| YHR033W | -      | 0.066062  | 1.838   | 0.82::0.29 | 2.81 |
| YKL040C | NFU1   | 0.067326  | 1.82949 | 0.34::0.12 | 2.8  |
| YGL195W | GCN1   | 0.069452  | 1.81547 | 0.71::0.25 | 2.78 |
| YNL022C | -      | 0.070368  | 1.80954 | 0.93::0.33 | 2.77 |
| YER137C | -      | 0.071104  | 1.80481 | 0.98::0.36 | 2.76 |
| YER155C | BEM2   | 0.071802  | 1.80037 | 0.83::0.30 | 2.76 |
| YFL036W | RPO41  | 0.072226  | 1.79769 | 0.28::0.10 | 2.75 |

|         |        |          |         |            |      |
|---------|--------|----------|---------|------------|------|
| YER103W | SSA4   | 0.072048 | 1.79881 | 0.99::0.36 | 2.75 |
| YNL294C | RIM21  | 0.07406  | 1.78625 | 0.27::0.10 | 2.74 |
| YCR008W | SAT4   | 0.074908 | 1.78103 | 0.60::0.22 | 2.73 |
| YDL013W | SLX5   | 0.075142 | 1.77959 | 1.11::0.41 | 2.73 |
| YLL033W | IRC19  | 0.076726 | 1.77001 | 0.27::0.10 | 2.71 |
| YJL128C | PBS2   | 0.076868 | 1.76916 | 0.97::0.36 | 2.71 |
| YHR028C | DAP2   | 0.081784 | 1.74043 | 1.00::0.37 | 2.67 |
| YNL284C | MRPL10 | 0.085468 | 1.7198  | 0.72::0.27 | 2.64 |
| YPL106C | SSE1   | 0.086288 | 1.71531 | 0.85::0.32 | 2.63 |
| YIL134W | FLX1   | 0.087476 | 1.70887 | 1.01::0.39 | 2.62 |
| YBR151W | APD1   | 0.090564 | 1.69243 | 1.01::0.39 | 2.6  |
| YPR189W | SKI3   | 0.091872 | 1.68561 | 0.44::0.17 | 2.59 |
| YKR085C | MRPL20 | 0.0984   | 1.65266 | 0.55::0.22 | 2.55 |
| YMR003W | AIM34  | 0.100316 | 1.64332 | 0.41::0.16 | 2.53 |
| YJL136C | RPS21B | 0.100308 | 1.64336 | 0.49::0.19 | 2.53 |
| YNR020C | ATP23  | 0.102062 | 1.63494 | 1.23::0.49 | 2.52 |
| YPL183W | -      | 0.102178 | 1.63438 | 0.61::0.24 | 2.52 |
| YOR030W | DFG16  | 0.103264 | 1.62923 | 0.35::0.14 | 2.51 |
| YHR206W | SKN7   | 0.104136 | 1.62512 | 0.25::0.10 | 2.51 |
| YER119C | AVT6   | 0.109278 | 1.60144 | 1.10::0.45 | 2.48 |
| YOR082C | -      | 0.116478 | 1.56973 | 1.29::0.53 | 2.44 |
| YBR098W | MMS4   | 0.118116 | 1.56273 | 0.97::0.40 | 2.43 |

---

**Supplementary Table 4 WDR76 physical interactions.** Identified proteins with above 1.6-fold difference in both H/L and L/H normalized ratios are listed. Hits are ranked by normalized H/L ratio.

| <b>Protein ID</b> | <b>Unique peptides</b> | <b>Unique sequence coverage (%)</b> | <b>HeLa H/L (reverse)</b> | <b>HeLa L/H (forward)</b> |
|-------------------|------------------------|-------------------------------------|---------------------------|---------------------------|
| WDR76             | 16                     | 51.3                                | 100.21                    | 31.40                     |
| HELLS             | 8                      | 24.3                                | 10.25                     | 8.02                      |
| HSPC075           | 7                      | 3.9                                 | 6.13                      | 3.70                      |
| CCT2              | 8                      | 50.7                                | 5.35                      | 2.26                      |
| XRCC6             | 13                     | 37.8                                | 5.27                      | 3.05                      |
| XRCC5             | 13                     | 31.3                                | 5.20                      | 2.99                      |
| ZC3HAV1           | 4                      | 22.7                                | 5.01                      | 2.95                      |
| HLC7              | 2                      | 24                                  | 4.75                      | 1.78                      |
| SUGT1             | 2                      | 25.8                                | 4.09                      | 1.78                      |
| LAMBR             | 7                      | 32.3                                | 3.83                      | 1.74                      |
| HSP90A            | 9                      | 15.2                                | 3.56                      | 1.68                      |
| ADPRT             | 27                     | 38.3                                | 3.49                      | 3.03                      |
| BAG2              | 3                      | 31.3                                | 3.00                      | 1.91                      |
| CCT7              | 9                      | 46.2                                | 2.93                      | 1.66                      |
| CCT8              | 14                     | 48.9                                | 2.84                      | 1.87                      |
| CCT5              | 13                     | 45.5                                | 2.81                      | 1.71                      |
| CCT3              | 13                     | 41.7                                | 2.64                      | 1.74                      |
| CYPB              | 3                      | 40.7                                | 2.48                      | 4.92                      |
| LRRC59            | 3                      | 11.4                                | 2.38                      | 3.54                      |
| CCT4              | 13                     | 53.1                                | 2.36                      | 1.60                      |
| CFIM25            | 3                      | 36.6                                | 2.30                      | 7.15                      |
| FXR1              | 13                     | 33.1                                | 2.08                      | 1.60                      |
| C1QBP             | 2                      | 21.1                                | 2.06                      | 1.52                      |
| HMGB1             | 2                      | 19                                  | 2.01                      | 2.09                      |
| RPS23             | 4                      | 30.1                                | 1.75                      | 1.70                      |
| RPL22             | 3                      | 30.5                                | 1.74                      | 2.40                      |
| FACT80            | 5                      | 17.6                                | 1.72                      | 1.71                      |
| RPS18             | 10                     | 58.6                                | 1.71                      | 2.00                      |
| RPS25             | 4                      | 24                                  | 1.64                      | 2.69                      |
| FEN1              | 7                      | 27.9                                | 1.61                      | 1.65                      |
| RPS17             | 2                      | 15.4                                | 1.59                      | 3.72                      |

**Supplementary Table 5** Yeast strains used in this study. Yeast strains in this study are derivatives of ML8-9A, a *RAD5 ADE2* derivative of W303-1A (*MATa BAR1 LYS2 ade2-1 can1-100 ura3-1 his3-11,15 leu2-3, 112 trp1-1 rad5-535*)<sup>4</sup>.

| <b>Strain</b> | <b>Genotype</b>                                                                  | <b>Source</b>     |
|---------------|----------------------------------------------------------------------------------|-------------------|
| CC1-3B        | <i>MATa btn2::KanMX MRC1-4ala-YFP</i>                                            | This study        |
| CC1-2D        | <i>MATa btn2::KanMX</i>                                                          | This study        |
| CC10-18B      | <i>MATa rad24::TRP1</i>                                                          | This study        |
| CC10-18C      | <i>MATa rad24::TRP1 cmr1::KanMX</i>                                              | This study        |
| CC17-5C       | <i>MATa csm3::KanMX</i>                                                          | This study        |
| CC17-9D       | <i>MATa csm3::KanMX cmr1::NatMX</i>                                              | This study        |
| CC18-13B      | <i>MATa elg1::KanMX</i>                                                          | This study        |
| CC18-3A       | <i>MATa elg1::KanMX cmr1::NatMX</i>                                              | This study        |
| CC2-6B        | <i>MATa hsp42::KanMX MRC1-4ala-YFP</i>                                           | This study        |
| CC2-2B        | <i>MATa hsp42::KanMX</i>                                                         | This study        |
| CC20-13A      | <i>MATa tof1::KanMX</i>                                                          | This study        |
| CC20-13C      | <i>MATa tof1::KanMX cmr1::NatMX</i>                                              | This study        |
| CC23-2A       | <i>MATa dcc1::KanMX</i>                                                          | This study        |
| CC23-2C       | <i>MATa dcc1::KanMX cmr1::NatMX</i>                                              | This study        |
| CC25-1A       | <i>MATa rad5::URA3 cmr1::KanMX</i>                                               | This study        |
| CC25-4A       | <i>MATa rad5::URA3</i>                                                           | This study        |
| CC26-11B      | <i>MATa btn2::KanMX</i>                                                          | This study        |
| CC26-2A       | <i>MATa btn2::KanMX cmr1::KanMX</i>                                              | This study        |
| CC27-4C       | <i>MATa cmr1::KanMX hsp42::KanMX ctf18::NatMX</i>                                | This study        |
| CC34-3B       | <i>MATa hel2::KanMX cmr1::NatMX</i>                                              | This study        |
| CC35-10A      | <i>MATa ubc4::KanMX cmr1::NatMX</i>                                              | This study        |
| CC35-3D       | <i>MATa ubc4::KanMX</i>                                                          | This study        |
| CC37-5A       | <i>MATa dia2::NatMX MRC1-4ala-YFP</i>                                            | This study        |
| CC39-3A       | <i>MATa hel2::KanMX</i>                                                          | This study        |
| CC4-19D       | <i>MATa dia2::NatMX</i>                                                          | This study        |
| CC4-3B        | <i>MATa dia2::NatMX cmr1::KanMX</i>                                              | This study        |
| CC41-14D      | <i>MATa mrc1AQ::LEU2::mrc1::URA3 cmr1::KanMX</i>                                 | This study        |
| CC41-6B       | <i>MATa mrc1AQ::LEU2::mrc1::URA3</i>                                             | This study        |
| CC42-12B      | <i>MATa rad9::HIS3</i>                                                           | This study        |
| CC44-8A       | <i>MATa</i>                                                                      | This study        |
| CC8-6D        | <i>MATa hta1-S129A hta2-S129A cmr1::NatMX</i>                                    | This study        |
| CC98          | <i>MATa MRC1-mCherry-sfGFP::hphNT1</i>                                           | This study        |
| CC102-9C      | <i>MATa MRC1-mCherry-sfGFP::hphNT1 btn2::KanMX</i>                               | This study        |
| DP1           | <i>MATa cmr1::KanMX</i>                                                          | This study        |
| DLY1296       | <i>MATa ade2-1 exo1::LEU2 cdc13-1</i>                                            | Ref. <sup>5</sup> |
| IG105         | <i>MATa can1Δ::STE2pr-Sp_his5 lyp1Δ his3Δ1 leu2Δ0 ura3Δ0 met15Δ0 cmr1::NatMX</i> | This study**      |



|           |                                                                                                                                 |                      |
|-----------|---------------------------------------------------------------------------------------------------------------------------------|----------------------|
| IG106-1C  | <i>MATa ade2-1 CAN1 lys2<sub>14A</sub> cmr1::KanMX</i>                                                                          | This study           |
| IG106-1D  | <i>MATa ade2-1 CAN1 lys2<sub>14A</sub> cmr1::KanMX mlh1::NatMX</i>                                                              | This study           |
| IG106-4D  | <i>MATa ade2-1 CAN1 lys2<sub>14A</sub></i>                                                                                      | This study           |
| IG106-5A  | <i>MATa ade2-1 CAN1 lys2<sub>14A</sub> mlh1::NatMX</i>                                                                          | This study           |
| IG111     | <i>MATa lys2<math>\Delta</math> TRP1 CMR1-yEmRFP</i>                                                                            | This study           |
| IG118-17C | <i>MATa msh2::KanMX cmr1::NatMX</i>                                                                                             | This study           |
| IG118-6C  | <i>MATa msh2::KanMX</i>                                                                                                         | This study           |
| IG119-4D  | <i>MATa msh6::KanMX</i>                                                                                                         | This study           |
| IG119-8D  | <i>MATa msh6::KanMX cmr1::NatMX</i>                                                                                             | This study           |
| IG120-2B  | <i>MATa pms1::KanMX cmr1::NatMX</i>                                                                                             | This study           |
| IG120-6B  | <i>MATa pms1::KanMX</i>                                                                                                         | This study           |
| IG122-1B  | <i>MATa msh3::KanMX</i>                                                                                                         | This study           |
| IG122-2A  | <i>MATa msh3::KanMX cmr1::NatMX</i>                                                                                             | This study           |
| IG137-28C | <i>MATa ade2-1 CAN1 lys2<sub>14A</sub> msh2::KanMX cmr1::KanMX</i>                                                              | This study           |
| IG137-66D | <i>MATa ade2-1 CAN1 lys2<sub>14A</sub> msh2::KanMX</i>                                                                          | This study           |
| IG139     | <i>MATa exo1::NatMX</i>                                                                                                         | This study           |
| IG147     | <i>MATa MRC1-4ala-YFP</i>                                                                                                       | This study           |
| IG148     | <i>MATa lys2<math>\Delta</math> TRP1 MRC1-4ala-CFP</i>                                                                          | This study           |
| IG152-4A  | <i>MATa exo1::NatMX cmr1::KanMX</i>                                                                                             | This study           |
| IG154-7D  | <i>MATa MRC1-4ala-CFP cmr1::KanMX</i>                                                                                           | This study           |
| IG155-3A  | <i>MATa CMR1-4ala-YFP mrc1::NatMX</i>                                                                                           | This study           |
| IG156-6C  | <i>MATa mrc1::NatMX cmr1::KanMX</i>                                                                                             | This study           |
| IG156-7D  | <i>MATa mrc1::NatMX</i>                                                                                                         | This study           |
| IG156-9B  | <i>MATa mrc1::NatMX cmr1::KanMX</i>                                                                                             | This study           |
| IG156-9C  | <i>MATa lys2<math>\Delta</math> TRP1 mrc1::NatMX cmr1::KanMX</i>                                                                | This study           |
| IG160-4A  | <i>MATa CMR1-6ala-3xYFP MRC1-4Ala-CFP</i>                                                                                       | This study           |
| IG162-1D  | <i>MATa rad52::his5</i>                                                                                                         | This study           |
| IG162-2D  | <i>MATa rad52::his5 cmr1::KanMX</i>                                                                                             | This study           |
| IG164-1D  | <i>MATa mre11::HIS3</i>                                                                                                         | This study           |
| IG164-2B  | <i>MATa mre11::HIS3 cmr1::KanMX</i>                                                                                             | This study           |
| IG165-4C  | <i>MATa rad59::HIS3</i>                                                                                                         | This study           |
| IG165-8B  | <i>MATa rad59::HIS3 cmr1::KanMX</i>                                                                                             | This study           |
| IG172-4B  | <i>MATa ade2-1 CAN1 lys2<sub>14A</sub> mrc1::NatMX cmr1::KanMX</i>                                                              | This study           |
| IG172-7C  | <i>MATa ade2-1 CAN1 lys2<sub>14A</sub> mrc1::NatMX</i>                                                                          | This study           |
| IG174     | <i>MATa his3<math>\Delta</math>0 leu2<math>\Delta</math>0 met15<math>\Delta</math>0 ura3<math>\Delta</math>0 Cmr1-TAP::HIS3</i> | Ref. <sup>6</sup> ** |
| IG177-8C  | <i>MATa ctf18::NatMX cmr1::KanMX</i>                                                                                            | This study           |
| IG177-9C  | <i>MATa ctf18::NatMX</i>                                                                                                        | This study           |
| IG179-3B  | <i>MATa lys2<math>\Delta</math> TRP1 mrc1::NatMX</i>                                                                            | This study           |
| IG184-11C | <i>MATa lys2<math>\Delta</math> TRP1 rad52::his5 cmr1::KanMX</i>                                                                | This study           |
| IG185-4C  | <i>MATa hdf1<math>\Delta</math> cmr1::KanMX</i>                                                                                 | This study           |
| IG185-7C  | <i>MATa hdf1<math>\Delta</math></i>                                                                                             | This study           |

|           |                                                                                                                           |             |
|-----------|---------------------------------------------------------------------------------------------------------------------------|-------------|
| IG186-10B | <i>MATa rad27::URA3 cmr1::KanMX</i>                                                                                       | This study  |
| IG186-5D  | <i>MATa rad27::URA3 lys2Δ</i>                                                                                             | This study  |
| IG187-6A  | <i>MATa rad10::KanMX</i>                                                                                                  | This study  |
| IG187-7D  | <i>MATa rad10::KanMX cmr1::NatMX</i>                                                                                      | This study  |
| IG188     | <i>MATa Cmr1-YFP::NatMX</i>                                                                                               | This study  |
| IG189-10B | <i>MATa can1Δ::STE2pr-LEU2 lyp1Δ his3Δ1<br/>leu2Δ0 ura3Δ0 MET15 NLS-yEmRFPv::HIS3<br/>ADE2 trp1-1 CMR1-YFP::NatMX</i>     | This study* |
| IG190-1C  | <i>MATa rev3::HIS3</i>                                                                                                    | This study  |
| IG190-4D  | <i>MATa rev3::HIS3 cmr1::KanMX</i>                                                                                        | This study  |
| IG194-1   | <i>MATa rad14::KanMX</i>                                                                                                  | This study  |
| IG194-2   | <i>MATa rad14::KanMX cmr1::NatMX</i>                                                                                      | This study  |
| IG199-1   | <i>MATa apn1::KanMX cmr1::NatMX</i>                                                                                       | This study  |
| IG199-2   | <i>MATa apn1::KanMX</i>                                                                                                   | This study  |
| IG237-17C | <i>MATa hsp42::KanMX cmr1::KanMX</i>                                                                                      | This study  |
| IG237-18A | <i>MATa hsp42::KanMX</i>                                                                                                  | This study  |
| IG238-9D  | <i>MATa hsp42::KanMX CMR1-4ala-YFP</i>                                                                                    | This study  |
| IG239-2B  | <i>MATa btn2::KanMX CMR1-4ala-YFP</i>                                                                                     | This study  |
| IG241     | <i>MATa can1Δ::STE2pr-LEU2 lyp1Δ his3Δ1<br/>leu2Δ0 ura3Δ0 MET15 NLS-yEmRFPv::HIS3<br/>ADE2 trp1-1 LYS2 CMR1-VC::KanMX</i> | This study* |
| IG246-2C  | <i>MATa ubc9::TRP1 leu2-3,112-ubc9-1::LEU2<br/>CMR1-4ala-YFP</i>                                                          | This study  |
| IG250-2C  | <i>MATa shu1::HIS3</i>                                                                                                    | This study  |
| IG250-9B  | <i>MATa shu1::HIS3 cmr1::KanMX</i>                                                                                        | This study  |
| IG251-3C  | <i>MATa srs2::HIS3 cmr1::KanMX</i>                                                                                        | This study  |
| IG253-2D  | <i>MATa mms21-11::LEU2 cmr1::KanMX</i>                                                                                    | This study  |
| IG256-5D  | <i>MATa slx8::KanMX cmr1::NatMX</i>                                                                                       | This study  |
| IG257-2C  | <i>MATa pph3::KanMX cmr1::NatMX</i>                                                                                       | This study  |
| IG257-9C  | <i>MATa pph3::KanMX</i>                                                                                                   | This study  |
| IG260-1D  | <i>MATa mms22::KanMX cmr1::NatMX</i>                                                                                      | This study  |
| IG260-2D  | <i>MATa mms22::KanMX</i>                                                                                                  | This study  |
| IG265-17A | <i>MATa rad18::KanMX</i>                                                                                                  | This study  |
| IG265-4D  | <i>MATa rad18::KanMX cmr1::NatMX</i>                                                                                      | This study  |
| IG266-18D | <i>MATa LYS2 trp1-1 ubp10::hphMX<br/>cmr1::NatMX</i>                                                                      | This study  |
| IG266-21A | <i>MATa LYS2 trp1-1 ubp10::hphMX</i>                                                                                      | This study  |
| IG267-20D | <i>MATa mms2::HIS3 TRP1</i>                                                                                               | This study  |
| IG267-9A  | <i>MATa mms2::HIS3 cmr1::NatMX TRP1</i>                                                                                   | This study  |
| IG285-7A  | <i>MATa TRP1 scc1-73 cmr1::KanMX ade2-1</i>                                                                               | This study  |
| IG285-9A  | <i>MATa TRP1 scc1-73 ade2-1</i>                                                                                           | This study  |
| IG292-11B | <i>MATa ctf18::NatMX hsp42::KanMX</i>                                                                                     | This study  |
| IG296-2C  | <i>MATa pph3::KanMX dia2::NatMX</i>                                                                                       | This study  |
| IG296-49B | <i>MATa pph3::KanMX dia2::NatMX<br/>cmr1::KanMX</i>                                                                       | This study  |
| IG299-9B  | <i>MATa rad9::HIS3 cmr1::KanMX</i>                                                                                        | This study  |
| IG302-1D  | <i>MATa CMR1-4ala-CFP SLX8-4ala-YFP</i>                                                                                   | This study  |

|           |                                                                                                               |                           |
|-----------|---------------------------------------------------------------------------------------------------------------|---------------------------|
| IG308-12D | <i>MATa TRP1 mlp1::HIS3 mlp2::HIS3 cmr1::KanMX</i>                                                            | This study                |
| IG308-13A | <i>MATa TRP1 mlp1::HIS3 mlp2::HIS3</i>                                                                        | This study                |
| IG310-15D | <i>MATa ura3::3xURA3-tetOx112 I-SceI-cs TetR-RFP cmr1::KanMX</i>                                              | This study                |
| IG309     | <i>MATa Cmr1-7myc::KanMX</i>                                                                                  | This study                |
| IG310-20B | <i>MATa ura3::3xURA3-tetOx112 I-SceI-cs TetR-RFP ctf18::NatMX</i>                                             | This study                |
| IG310-3B  | <i>MATa ura3::3xURA3-tetOx112 I-SceI-cs TetR-RFP</i>                                                          | This study                |
| IG311-1B  | <i>MATa ura3::3xURA3-tetOx112 I-SceI-cs TetR-RFP cmr1::KanMX ctf18::NatMX</i>                                 | This study                |
| IG315     | <i>MATa ade2-1 mrc1AQ-4ala-YFP</i>                                                                            | This study                |
| IG322-12A | <i>MATa pph3::KanMX dia2::NatMX hsp42::KanMX</i>                                                              | This study                |
| IG323-19D | <i>MATa pph3::KanMX dia2::NatMX btn2::KanMX</i>                                                               | This study                |
| IG328-4C  | <i>MATa TRP1 Rpn11-GFP Cmr1-yEmRFP</i>                                                                        | This study*               |
| IG45-8A   | <i>MATa lys2Δ</i>                                                                                             | This study                |
| IG46-1B   | <i>MATa lys2Δ RFA1-8ala-YFP</i>                                                                               | This study                |
| IG54-11D  | <i>MATa lys2Δ RAD52-YFP</i>                                                                                   | This study                |
| IG66      | <i>MATa CMR1-4ala-YFP</i>                                                                                     | This study                |
| IG71-2B   | <i>MATa lys2Δ CMR1-YFP</i>                                                                                    | This study                |
| IG72-5C   | <i>MATa lys2Δ TRP1 BARI::LEU2 RAD52-yEmRFP</i>                                                                | This study                |
| IG79-6D   | <i>MATa lys2Δ TRP1 cmr1::KanMX</i>                                                                            | This study                |
| IG8-5D    | <i>MATa srs2::HIS3</i>                                                                                        | This study                |
| LBy41     | <i>MATa ade2-1 POL2-13myc::KanMX</i>                                                                          | L. Bjergbæk               |
| ML41-4B   | <i>MATa Mec1-YFPint</i>                                                                                       | Ref. <sup>7</sup>         |
| ML659-4B  | <i>MATa can1Δ::STE2pr-LEU2 lyp1Δ his3Δ1 leu2Δ0 ura3Δ0 LYS2 MET15 NLS-yEmRFP<sub>prv</sub>::HIS3 ADE2 trp1</i> | This study*               |
| ML702-R   | <i>MATa CMR1-4ala-YFP yEmRFP-SMT3</i>                                                                         | This study                |
| ML8-9A    | <i>MATa</i>                                                                                                   | Ref. <sup>8</sup>         |
| ML657     | <i>MATa NLS-yEmRFP::HIS3</i>                                                                                  | This study                |
| ML801-5B  | <i>MATa Mec1-YFPint cmr1::KanMX</i>                                                                           | This study                |
| ML807-2D  | <i>MATa ade2-1 cdc13-1 rpd3::KanMX</i>                                                                        | This study                |
| ML808-12D | <i>MATa ade2-1 cdc13-1 cmr1::KanMX</i>                                                                        | This study                |
| ML815-8A  | <i>MATa ade2-1 cdc13-1</i>                                                                                    | This study                |
| ML821-4C  | <i>MATa ade2-1 cdc13-1 btn2::KanMX</i>                                                                        | This study                |
| ML822-4C  | <i>MATa ade2-1 cdc13-1 hsp42::KanMX</i>                                                                       | This study                |
| NEB144-4C | <i>MATa mms21-11::LEU2</i>                                                                                    | This study                |
| NEB248-5A | <i>MATa hta1-S129A hta2-S129A RAD52-YFP</i>                                                                   | This study                |
| NEB290-1B | <i>MATa slx8::KanMX</i>                                                                                       | This study                |
| R113      | <i>MATa cyc3-3 his1</i>                                                                                       | R. Rothstein <sup>§</sup> |
| SG936     | <i>MATa can1Δ::STE2pr-SpHIS5 lyp1Δ ura3Δ0 leu2Δ0 his3Δ1 met15Δ0</i>                                           | Steen Holmberg            |

|           |                                                                        |                   |
|-----------|------------------------------------------------------------------------|-------------------|
| SMG259-3C | <i>MAT<math>\alpha</math> lys2<math>\Delta</math> TRP1 rad52::his5</i> | This study        |
| SMG59-11B | <i>MAT<math>\alpha</math> rad52::his5</i>                              | This study        |
| W4700-10C | <i>MAT<math>\alpha</math> lys2<math>\Delta</math> TRP1</i>             | Ref. <sup>8</sup> |

\* W303/S288C mixed background

\*\* S288C background

§ W303-related background

**Supplementary Table 6** Plasmids used in this study

| Plasmid               | Genotype                                                                                        | Source             |
|-----------------------|-------------------------------------------------------------------------------------------------|--------------------|
| <i>Yeast plasmids</i> |                                                                                                 |                    |
| p4339                 | <i>KAN<sup>R</sup> AMP<sup>R</sup> NAT<sup>R</sup></i>                                          | Ref. <sup>9</sup>  |
| pEH333                | <i>AMP<sup>R</sup> LEU2 hMLH1</i>                                                               | Ref. <sup>1</sup>  |
| pEH334                | <i>AMP<sup>R</sup> LEU2</i>                                                                     | Ref. <sup>1</sup>  |
| pESC-VHL-GFP          | <i>AMP<sup>R</sup> LEU2 p-ESC-VHL-GFP</i>                                                       | Ref. <sup>10</sup> |
| pESC-mCherry-VHL      | <i>AMP<sup>R</sup> URA3 p-ESC-mCherry-VHL</i>                                                   | Ref. <sup>10</sup> |
| pFA6a                 | <i>AMP<sup>R</sup> KanMX6</i>                                                                   | Ref. <sup>11</sup> |
| pGAD-C2               | <i>AMP<sup>R</sup> LEU2 2<math>\mu</math></i>                                                   | Ref. <sup>12</sup> |
| pIG13                 | <i>AMP<sup>R</sup> URA3 2<math>\mu</math> ORI<br/>Cmr1-YFP</i>                                  | This study         |
| pIG14                 | <i>AMP<sup>R</sup> URA3 2<math>\mu</math> ORI<br/>Cmr1<sub>NTD(1-173)</sub>-YFP</i>             | This study         |
| pIG15                 | <i>AMP<sup>R</sup> URA3 2<math>\mu</math> ORI<br/>Cmr1<sub>SV40-NLS-WD40(174-522)</sub>-YFP</i> | This study         |
| pIG20                 | <i>KAN<sup>R</sup> LEU2 2<math>\mu</math> ORI<br/>CCT6-YFP</i>                                  | This study         |
| pMaM60                | <i>AMP<sup>R</sup> mCherry-sfGFP-<br/>hphNT1</i>                                                | Ref. <sup>13</sup> |

|                        |                                                                    |                    |
|------------------------|--------------------------------------------------------------------|--------------------|
| pML122                 | <i>KAN<sup>R</sup> LEU2 yEmRFP-SMT3</i>                            | This study         |
| pML133                 | <i>AMP<sup>R</sup> URA3 yEmRFP-SMT3</i>                            | This study         |
| pML84                  | <i>AMP<sup>R</sup> LEU2 ADH1p-NLS-yEmRFP 2<math>\mu</math></i>     | This study         |
| pML97                  | <i>AMP<sup>R</sup> HIS3 2<math>\mu</math> 3xYFP-5'-K.l. URA3</i>   | This study         |
| pML98                  | <i>AMP<sup>R</sup> HIS3 2<math>\mu</math> 3xYFP-3'-K.l. URA3</i>   | This study         |
| pNEB21                 | <i>AMP<sup>R</sup> TRP1 CFP-NUP49</i>                              | Ref. <sup>14</sup> |
| pNEB30                 | <i>AMP<sup>R</sup> HIS3 2<math>\mu</math> yEmRFP-5'-K.l. URA3</i>  | Ref. <sup>7</sup>  |
| pNEB31                 | <i>AMP<sup>R</sup> HIS3 2<math>\mu</math> yEmRFP-3'-K.l. URA3</i>  | Ref. <sup>7</sup>  |
| pNEB32                 | <i>AMP<sup>R</sup> TRP1 yEmRFP-NUP49</i>                           | This study         |
| pRS313-3myc-Smt3       | <i>AMP<sup>R</sup> HIS3 2<math>\mu</math> myc<sub>3</sub>-Smt3</i> | Ref. <sup>15</sup> |
| pRS416                 | <i>AMP<sup>R</sup> URA3</i>                                        | Ref. <sup>16</sup> |
| pRS426                 | <i>AMP<sup>R</sup> URA3 2<math>\mu</math></i>                      | Ref. <sup>16</sup> |
| pWJ1164                | <i>AMP<sup>R</sup> HIS3 2<math>\mu</math> YFP-5'-K.l. URA3</i>     | Ref. <sup>17</sup> |
| pWJ1165                | <i>AMP<sup>R</sup> HIS3 2<math>\mu</math> YFP-3'-K.l. URA3</i>     | Ref. <sup>17</sup> |
| pWJ1213                | <i>AMP<sup>R</sup> HIS3 Rad52-YFP</i>                              | Ref. <sup>18</sup> |
| <i>Human plasmid</i>   |                                                                    |                    |
| pcDNA-DEST53-GFP-WDR76 | <i>Kan<sup>R</sup>/Neo<sup>R</sup> GFP-WDR76</i>                   | This study         |

**Supplementary Table 7** Primers used in this study

| Primer name        | Sequence (5' to 3')                                                             |
|--------------------|---------------------------------------------------------------------------------|
| Cmr1-VC155-fw      | ATATTCCTCTTTACTGATGACTCCGGAACCATAA<br>AGCAGGAAGAAGGTCGACGGATCCCCGGGTT           |
| Cmr1-VC155-rv      | AAAAGCGGGAGAGAAAAAAGGCAGTGCGGGTA<br>ACTGAGATGTTTTTCGATGAATTCGAGCTCGTT           |
| Cmr1-YFP::NatMX-fw | GCAGAGAAAAAGCTATTTATTGTTTCTGTCCTTC<br>GCTTTAAACATAGAGACATGGAGGCCCAAGAAAT<br>ACC |
| Cmr1-YFP::NatMX-rv | ACTGTGAGTTATGATGCATTTATAATAAGCAAT                                               |

|                    |                                                                               |
|--------------------|-------------------------------------------------------------------------------|
|                    | GATAAAAAGGACAAAATACAGTATAGCGACCA<br>GCATTC                                    |
| Cmr1up-F_HindIII   | GAGAAAGCTTGGTGGCACACAATGAC                                                    |
| Cmr1down-R_XhoI    | GAGACTCGAGCGAAGGACAGAAACAAT                                                   |
| Cmr1N-term-rv      | ATATAGATCCAAATCAAATTC                                                         |
| Cmr1N-term-fw      | GAATTTGATTTGGATCTATATGCTGCAGCTGCA<br>ATGAGT                                   |
| Cmr1WD40-rv        | ACTTTTCTTTTTTTTTTTTGGCATTCTTGACTGAAA<br>AGCAGCTTTC                            |
| Cmr1WD40-fw        | ATGCCAAAAAAAAAAAAAGAAAAGTTGAAGATCC<br>AGACGTTTTTCAACCGAACG                    |
| CCT6_1-fw          | TTGCTTAGACAAGCGCACC                                                           |
| CCT6_2-rv          | GGTCAGTGTTCTCTGTAAC                                                           |
| CCT6_3-fw          | TAGGCGAGGAAAAATTCACATACGTTACAGAGA<br>ACACTGACCCCGGGGGATGAGTAAAGGAGAA<br>GAAC  |
| CCT6_4-rv          | AGGGCATAATGAGTGGAGCCCTTGATTAAGATG<br>GTGCAAGACTTCCCCCTTTGTATAGTTCATCCA<br>TGC |
| CCT6_5-fw          | AAGTCTTGCACCATCTTAATC                                                         |
| CCT6_6-rv          | CGAATCCTGAGTTCTTCACC                                                          |
| NLSyEmRFP-F        | TGGGTACCGCCCCAAAAAAAAAAAAAGAAAAGTT<br>GAAGATCCAATGGTTTCAAAGGTGAAGAAG          |
| NLSyEmRFP-R        | GCTAGAATTCTTATTTATATAATTCATCCATACC<br>ACC                                     |
| Cmr1-13mycFW       | AATATTCCTCTTTACTGATGACTCCGGAACCATA<br>AAGCAGGAAGAACGGATCCCCGGGTAAATTAA        |
| Cmr1-13mycRV       | CTGAAAAGCGGGAGAGAAAAAAGGCAGTGCGG<br>GTAAGTGAAGATGTTTGAATTCGAGCTCGTTTAA<br>AC  |
| Smt3-upF           | CGTAGTCCCCAAGGAATAATG                                                         |
| SMT3-R             | ATACGTAGCACCACCAATCTG                                                         |
| yEmRFP-Smt3-up-R   | CTTCTTCACCTTTTGAACCATCGCTCGTGTATT<br>TATTTGTA AAC                             |
| yEmRFP-Smt3start-F | GGTGGTATGGATGAATTATATAAAGGAGGTCCA                                             |

|                      |                                    |
|----------------------|------------------------------------|
| 6ala-F-ClaI          | GGTGGAATGTCGGACTCAGAAGTC           |
| XFP-F-EcoRI          | GGTATCGATGCTGCAGCTGCAGCTGCAATG     |
| XFP-R-XmaI           | AGGTGAATTCATGAGTAAAGGAGAAGAAC      |
| XFP-F-SacI           | AGCCCGGGTTTGTATAGTTCATCCATGC       |
| XFP-R-StuI-SphI-SacI | GGTGAGCTCATGAGTAAAGGAGAAGAAC       |
|                      | TAGGAGCTCTCGACGGCATGCTGCAGGCCTTTT  |
|                      | GTATAGTTCATCCATGC                  |
| XFP-F-StuI           | AGGTAGGCCTATGAGTAAAGGAGAAGAAC      |
| XFPstop-R-SphI       | AGGCATGCCTATTTGTATAGTTCATCCATGC    |
| Cmr1-F               | CCTTTCTGCGAAGTTGGAG                |
| Cmr1-6ala-up         | TGCAGCTGCAGCTGCAGCTTCTTCCTGCTTTATG |
|                      | GTTCC                              |
| Cmr1-3xdown          | GGCATGCCGTCGAGAGCTAAACATCTCAGTTAC  |
|                      | CCGCAC                             |
| Cmr1down-R           | ACATTTTCATCCTCGGGG                 |
| 6ala-F               | CTGCAGCTGCAGCTGCAATG               |
| 3'-int               | GAGCAATGAACCCAATAACGAAATC          |
| 5'-int               | CTTGACGTTTCGTTTCGACTGATGAGC        |
| term-R               | AGCTCTCGACGGCATGCC                 |
| Mrc1-S3-F            | TCGAATAAACTTTTTGAAAGCGGACAAGATAGC  |
|                      | TTTGATAATCGTACGCTGCAGGTCGAC        |
| Mrc1-S2-R            | GGAGTTCAATCAACTTCTTCGGAAAAGATAAAA  |
|                      | AACCACTAATCGATGAATTCGAGCTCG        |

---

## Supplementary Methods

### Sister chromatid cohesion assay

Defects in sister chromatid cohesion were analyzed<sup>3</sup> in strains carrying *TetO* tandem repeats on chromosome V, 110 kb from the centromere (*URA3* locus), and constitutively expressing TetR-RFP were grown to exponential phase, arrested in G2 with 8  $\mu\text{g ml}^{-1}$  nocodazole for 2.5 hours and imaged.

### Chromatin immunoprecipitation.

ChIP was performed as described before<sup>19</sup>. Briefly, cells were synchronized in G1 with  $\alpha$ -factor at 30°C, washed and released in pre-warmed YPD medium containing 0.2 M HU for 10, 15, 30 and 60 minutes before fixation with 1% formaldehyde. Monoclonal anti-Myc antibody (9E10, Santa Cruz Biotechnology) was incubated with whole cell extract before coupling with equilibrated Dynabeads. Samples incubated with Dynabeads without antibody were used as background control. Real-time quantitative PCR was performed at the early-replicating ARS305, at regions 3 kb upstream and downstream ARS305 and at late-replicating ARS501, using a CFX96 Real-time System (BioRad). The average of two to four independent real-time PCR measurements and standard deviation is reported. Fold increase of the IP over the beads-only control was calculated as before<sup>19</sup> using the formula: fold increase =  $2^{(C_{T \text{ input}} - C_{T \text{ IP}})} / 2^{(C_{T \text{ input}} - C_{T \text{ beads}})}$ .

### Flow cytometry

Cultures were harvested by centrifugation and fixed in 70% ethanol overnight at 4°C. Fixed cells were washed and resuspended in 50 mM NaCitrate (pH 7) prior to sonication and addition of RNase A (Sigma) to a final concentration of 250  $\mu\text{g ml}^{-1}$ . Cells were incubated for 1 hour at 55°C followed by addition of Proteinase K (Sigma) to a final concentration of 1  $\text{mg ml}^{-1}$  and further incubation at 55°C for 1 hour. Cells were either stored at 4°C or directly stained with propidium iodide (PI, Sigma) by adding 20  $\mu\text{l}$  cell suspension to 500  $\mu\text{l}$  50 mM NaCitrate (pH 7) containing 16  $\mu\text{g ml}^{-1}$  PI. Sample PI profiles were recorded using a FACSCalibur (BD Biosciences). Data were processed using FlowJo software (10.0.6).



## Supplementary References:

1. Shimodaira, H. *et al.* Functional analysis of human MLH1 mutations in *Saccharomyces cerevisiae*. *Nat Genet* **19**, 384-389 (1998).
2. Maere, S., Heymans, K. & Kuiper, M. BiNGO: a Cytoscape plugin to assess overrepresentation of gene ontology categories in biological networks. *Bioinformatics (Oxford, England)* **21**, 3448-3449 (2005).
3. Parnas, O. *et al.* The ELG1 clamp loader plays a role in sister chromatid cohesion. *PLoS One* **4**, e5497 (2009).
4. Thomas, B.J. & Rothstein, R. Elevated recombination rates in transcriptionally active DNA. *Cell* **56**, 619-630 (1989).
5. Zubko, M.K., Guillard, S. & Lydall, D. Exo1 and Rad24 differentially regulate generation of ssDNA at telomeres of *Saccharomyces cerevisiae* *cdc13-1* mutants. *Genetics* **168**, 103-115 (2004).
6. Ghaemmaghami, S. *et al.* Global analysis of protein expression in yeast. *Nature* **425**, 737-741 (2003).
7. Silva, S., Gallina, I., Eckert-Boulet, N. & Lisby, M. Live Cell Microscopy of DNA Damage Response in *Saccharomyces cerevisiae*. *Methods Mol Biol* **920**, 433-443 (2012).
8. Germann, S.M. *et al.* Dpb11/TopBP1 plays distinct roles in DNA replication, checkpoint response and homologous recombination. *DNA Repair (Amst)* **10**, 210-224 (2011).
9. Tong, A.H. *et al.* Systematic genetic analysis with ordered arrays of yeast deletion mutants. *Science* **294**, 2364-2368. (2001).
10. Kaganovich, D., Kopito, R. & Frydman, J. Misfolded proteins partition between two distinct quality control compartments. *Nature (London)* **454**, 1088-1095 (2008).
11. Bahler, J. *et al.* Heterologous modules for efficient and versatile PCR-based gene targeting in *Schizosaccharomyces pombe*. *Yeast* **14**, 943-951 (1998).
12. James, P., Halladay, J. & Craig, E.A. Genomic libraries and a host strain designed for highly efficient two-hybrid selection in yeast. *Genetics* **144**, 1425-1436 (1996).
13. Khmelinskii, A. *et al.* Tandem fluorescent protein timers for in vivo analysis of protein dynamics. *Nat Biotechnol* **30**, 708-714 (2012).
14. Khadaroo, B. *et al.* The DNA damage response at eroded telomeres and tethering to the nuclear pore complex. *Nat. Cell Biol.* **11**, 980-987 (2009).
15. Panse, V.G., Hardeland, U., Werner, T., Kuster, B. & Hurt, E. A proteome-wide approach identifies sumoylated substrate proteins in yeast. *J Biol Chem* **279**, 41346-41351 (2004).
16. Sikorski, R.S. & Hieter, P. A system of shuttle vectors and yeast host strains designed for efficient manipulation of DNA in *Saccharomyces cerevisiae*. *Genetics* **122**, 19-27 (1989).
17. Lisby, M., Rothstein, R. & Mortensen, U.H. Rad52 forms DNA repair and recombination centers during S phase. *Proc. Natl. Acad. Sci. USA* **98**, 8276-8282 (2001).
18. Feng, Q. *et al.* Rad52 and Rad59 exhibit both overlapping and distinct functions. *DNA Repair (Amst)* **6**, 27-37 (2007).

19. Cobb, J.A., Bjergbaek, L., Shimada, K., Frei, C. & Gasser, S.M. DNA polymerase stabilization at stalled replication forks requires Mec1 and the RecQ helicase Sgs1. *EMBO J.* **22**, 4325-4336 (2003).
